1 **Rhizospheric and endophytic *Pseudomonas aeruginosa* in edible vegetable plants**  
2 **share molecular and metabolic traits with clinical isolates**

3

4 Sakthivel Ambreetha<sup>1, 2</sup>, Ponnusamy Marimuthu<sup>1</sup>, Kalai Mathee<sup>2, 3, \*</sup>, and Dananjeyan  
5 Balachandar<sup>1, \*</sup>

6

7 <sup>1</sup>Department of Agricultural Microbiology, Tamil Nadu Agricultural University, Coimbatore,  
8 Tamil Nadu, India.

9 <sup>2</sup>Department of Human and Molecular Genetics, Herbert Wertheim College of Medicine,  
10 Florida International University, Florida, United States of America.

11 <sup>3</sup>Biomolecular Sciences Institute, Florida International University, Miami, FL, USA.

12

13 **\*Corresponding authors:**

14 Dananjeyan Balachandar and Kalai Mathee

15 Email address: [dbalu@tnau.ac.in](mailto:dbalu@tnau.ac.in) and [Kalai.mathee@fiu.edu](mailto:Kalai.mathee@fiu.edu)

16

17 **Running title**

18 Comparing agricultural and clinical *P. aeruginosa*

19

20

21

## 22 **Abstract**

23 *Pseudomonas aeruginosa*, a leading opportunistic pathogen causing hospital-acquired  
24 infections is predominantly present in agricultural settings. There are minimal attempts  
25 to examine the molecular and functional attributes shared by agricultural and clinical  
26 strains of *P. aeruginosa*. This study aims to investigate the presence of *P. aeruginosa* in  
27 edible vegetable plants (including salad vegetables) and analyze the evolutionary and  
28 metabolic relatedness of the agricultural and clinical strains. Eighteen rhizospheric and  
29 endophytic *P. aeruginosa* strains were isolated from cucumber, tomato, eggplant, and  
30 chili directly from the farms. The identity of these strains was confirmed using  
31 biochemical, and molecular markers and their genetic and metabolic traits were  
32 compared with clinical isolates. DNA fingerprinting analyses and 16S rDNA-based  
33 phylogenetic tree revealed that the plant- and human-associated strains are  
34 evolutionarily related. Both agricultural and clinical isolates possessed plant-beneficial  
35 properties, including mineral solubilization (phosphorous, potassium, and zinc),  
36 ammonification, and the ability to release extracellular siderophore and indole-3 acetic  
37 acid. These findings suggest that rhizospheric and endophytic *P. aeruginosa* strains are  
38 genetically and functionally analogous to the clinical isolates. This study highlights the  
39 edible plants as a potential source for human and animal transmission of *P. aeruginosa*.

40

## 41 **Key words**

42 ERIC PCR, BOX PCR, Auxin, Plant growth-promoting rhizobacteria, PGPR, Agricultural *P.*  
43 *aeruginosa*

44

45

## 46 **Introduction**

47 *Pseudomonas aeruginosa* was discovered in 1882 when Carle Gessard noticed a bluish  
48 green color in injured soldiers' bandages (Gessard 1984). This color was due to the blue-  
49 green phenazine compound synthesized by *P. aeruginosa*, making it distinct from other  
50 Pseudomonads (Reyes et al. 1981; Turner and Messenger 1986). *P. aeruginosa* is a  
51 Gram-negative gamma-proteobacterium that colonizes diverse host systems, including  
52 the nematodes, insects, plants, animals, and humans (Schroth et al. 1977; Botzenhart  
53 and Doring 1993; Banerjee and Dangar 1995; Rahme et al. 1995). Due to its recalcitrant  
54 pathogenicity and drug resistance, this omnipresent organism is listed as a serious threat  
55 pathogen by the US Centers for Disease Control (CDC), World Health Organization  
56 (WHO), and UK Public Health England (PHE) (CDC AR, 2019; WHO News, 2019; PHE,  
57 2020)

58  
59 *P. aeruginosa* causes fatal infections in immunocompromised individuals and patients  
60 with genetic disorders such as cystic fibrosis (Reynolds et al. 1975; Von Graevenitz 1977).  
61 Its infections in otherwise healthy individuals include folliculitis, endocarditis,  
62 osteomyelitis, and sclerokeratitis (Radford et al. 2000; Tate et al. 2003; Doustdar et al.  
63 2019). According to the International Nosocomial Infection Control Consortium (INICC),  
64 *P. aeruginosa* is among the significant hospital-acquired pathogens leading to  
65 ventilator-, surgical implant-, central line- and urinary catheter-associated infections  
66 (Rosenthal et al. 2020). *P. aeruginosa* releases an arsenal of virulence factors that  
67 include rhamnolipid, pyocyanin, pyoverdine, pyochelin, elastases, proteases, lipases,  
68 polysaccharides, hydrogen cyanide, and exotoxins to breach the mucus barriers and  
69 establish the infection (Balasubramanian et al. 2012; Moradali et al. 2017).

70 The role of *P. aeruginosa* in the agricultural ecosystem is controversial. Several studies  
71 showed that *P. aeruginosa* supports plant growth and disease control through multiple  
72 mechanisms (Ali Siddiqui and Ehteshamul-Haque 2001; Adesemoye and Ugoji 2009;  
73 Yasmin et al. 2014; Radhapriya et al. 2015; Arif et al. 2016; Durairaj et al. 2017; Gupta  
74 and Buch 2019; Chandra et al. 2020). *P. aeruginosa* helps in the solubilization of  
75 complex soil minerals (tri-calcium phosphate, potassium aluminum silicate, and zinc  
76 oxide), ammonification, and nitrification (Obaton et al. 1968; Illmer and Schinner 1992;  
77 Fasim et al. 2002; Jha et al. 2009; Gupta and Buch 2019). . This bacterium also releases  
78 salicylic acid, hydrogen cyanide, pyocyanin, rhamnolipid, and siderophores to inhibit  
79 the growth of other pathogens and insect pests that compete with it in the agricultural  
80 ecosystem (Kloepper et al. 1980; Cartwright et al. 1995; De Meyer and Höfte 1997; Kim  
81 et al. 2000; Audenaert et al. 2002). Conversely, some argue that *P. aeruginosa* is a  
82 plant pathogen that inhibits seed germination and causes rot and wilt in maize,  
83 ginseng, melon, chickpea, and tobacco (Clara 1930; Elrod and Braun 1942; Mondal et  
84 al. 2012; Gao et al. 2014; Tiwari and Singh 2017). It was believed that *P. aeruginosa*  
85 colonizing humans and plants were two different species in the early days. Schroth and  
86 his associates proved that the clinical strains of *P. aeruginosa* could also cause plant  
87 infections (Schroth et al. 1977). His group also identified that the most used virulent  
88 strain *P. aeruginosa* PA14, isolated initially from Pittsburgh burn ward, causes extensive  
89 plant rot in cucumber, lettuce, potato, and tomato (Mathee 2018; Schroth et al. 2018).

90

91 To date, *P. aeruginosa* has been reported in tomato, radish, celery, carrot, endive,  
92 cabbage, onion, lettuce, watercress, chicory, Swiss chard, and cucumber from the  
93 hospital kitchens in the USA and Brazil (Kominos et al. 1972; Wright et al. 1976; Correa et

94 al. 1991). Furthermore, the *P. aeruginosa* contamination in fresh vegetables have been  
95 reported in the retail markets, supermarkets, local vendors, and canteens in India,  
96 Jamaica, France, Germany, Ireland, Holand, and United Kingdoms (Viswanathan and  
97 Kaur 2001; Curran et al. 2005; Allydice-Francis and Brown 2012). Agricultural soil and  
98 plants as the source of *P. aeruginosa* infection was first reported in 1970's (Green et al.  
99 1974; Cho et al. 1975). However, Deredjian et al. (2014) reported a low occurrence of *P.*  
100 *aeruginosa* in agricultural soil in France and Burkina Faso. Most of the studies on  
101 agricultural *P. aeruginosa* have focused on characterizing one or two strains (Kumar et  
102 al. 2013; Jasim et al. 2014; Akinsanya et al. 2015; Shi et al. 2015; Devi et al. 2017; Wu et  
103 al. 2018; Roychowdhury et al. 2019; lasur Kruh et al. 2020; Mukherjee et al. 2020; Singh et  
104 al. 2021; Sun et al. 2021). There is a clear gap in looking into the vegetable plants'  
105 rhizosphere and their internal tissues as the potential source of *P. aeruginosa*. In the  
106 current study, we have isolated *P. aeruginosa* from the rhizosphere and internal tissues  
107 of the vegetable plants directly from the farms in Southern India. Their genetic and  
108 metabolic characteristics were compared with well-characterized clinical *P.*  
109 *aeruginosa*.

110

## 111 **Materials and Methods**

### 112 **Bacterial strains and culture conditions**

113 Clinical strains of *P. aeruginosa*, PAO1, ATCC10145, and ATCC9027 were used as  
114 controls (Haynes 1951; Holloway 1955; Picard et al. 1994). A well-characterized plant  
115 growth-promoting rhizobacteria (PGPR), *Bacillus altitudinis*, FD48 (Table 1) was used as  
116 the control for all PGPR experiments. Commercial phosphorous solubilizing  
117 bacteria *Bacillus megaterium* strain var *phosphaticum* Pb1, potassium releasing  
118 bacteria *Bacillus mucilaginous* strain KRB9, and zinc solubilizing bacteria *Pseudomonas*  
119 *chloraraphis* strain ZSB15 (Table 3) were used as the positive controls for estimating the  
120 respective mineral solubilization experiments. *P. aeruginosa* strains were periodically  
121 sub-cultured and grown in *Pseudomonas* agar (for pyocyanin) medium (PAP, Himedia);  
122 *P. chloraraphis* in King's B medium (King et al. 1954); *B. altitudinis* and *B. mucilaginous* in  
123 nutrient agar medium at 37°C.

124

### 125 **Isolation of plant-associated and rhizosphere *P. aeruginosa***

126 Samples were collected from edible crops, namely rice, tomato, cucumber, eggplant,  
127 chili, and bottle, and bitter gourds and their associated rhizosphere (soil adhering to the  
128 roots). These samples were from the wetland and garden land ecosystems of Tamil  
129 Nadu Agricultural University, India (latitude, 11° 07' 3.36"; longitude 76° 59' 39.91"). In  
130 each crop field, five plant samples were collected from random sites and pooled  
131 together.

132

133 For isolation of rhizospheric *P. aeruginosa*, 10 g of the soil sample was pooled from five  
134 crops of each kind. A 100-ml sterile distilled water (pH 7.0) was added to the soil and

135 mixed vigorously. The soil solution was then serially diluted up to  $10^{-4}$ . One ml of the  
136 diluent combined with 20 ml of PAP medium was plated using the conventional pour  
137 plate technique (Van Soestbergen and Lee 1969; Elbadry et al. 1999). The plates were  
138 incubated overnight at 37°C.

139

140 For isolation of the endophytes, the plant samples were surface sterilized using sodium  
141 hypochlorite (5% chlorine) for 10 min to remove epiphytic and saprophytic organisms  
142 (Gardner et al. 1982). The samples were then washed with sterile distilled water. The  
143 wash water was collected and plated to confirm the absence of any surface microbes.  
144 The surface-sterilized plant samples were crushed in sterile pestle and mortar. The  
145 crushed samples were mixed with sterile distilled water (pH 7.0) in 1:10 weight/volume.  
146 This mixture was serially diluted with sterile distilled water up to  $10^{-2}$ . One ml of the diluent  
147 combined with 20 ml of PAP medium was plated using the pour plate technique (Van  
148 Soestbergen and Lee 1969; Elbadry et al. 1999). The plates were incubated overnight  
149 at 37°C.

150

### 151 **Pyocyanin production**

152 The colonies were initially screened based on pyocyanin production, indicative of *P.*  
153 *aeruginosa*, by the bluish-green discoloration on the PAP medium. For further  
154 confirmation, selected individual isolates were grown in 30 ml of glycine-alanine broth  
155 (Ingledeew and Campbell 1969; Devnath et al. 2017). The 48-h cultures were centrifuged  
156 at 5000 g for 15 minutes. The supernatant was mixed with 0.5 V chloroform, vortexed,  
157 and allowed to settle for 10 min. The blue solvent layer (bottom) was acidified with 0.2 V  
158 of 0.1 N HCl, and its absorbance was measured at 520 nm (Varian Cary® - 50, Australia)

159 (Essar et al. 1990). The concentration of pyocyanin ( $\mu\text{g/ml}$ ) was estimated by multiplying  
160 of  $\text{OD}_{520}$  with pyocyanin extinction coefficient (17.072) (Kurachi 1958).

161

### 162 **Molecular screening**

163 Genomic DNA was extracted from the select isolates using the hexadecyl trimethyl  
164 ammonium bromide method (Melody 1997). The purity of DNA was analyzed using a  
165 Nanodrop spectrophotometer (Thermo Scientific, Nanodrop™ 2000c). The absorbance  
166 of 1.8 at 260/280 was used as the indicator of DNA purity. *P. aeruginosa* genus- (PA-GS-  
167 F/R) and species- (PA-SS-F/R) specific primers (Table 3) were used for molecular  
168 confirmation of the chosen isolates as previously described (Spilker et al. 2004).

169

### 170 **16S rDNA sequencing**

171 Nearly full-length *P. aeruginosa* 16S rRNA genes were amplified using universal  
172 eubacterial primers (Table 2; Weisburg et al. 1991). PCR amplification was performed in  
173 a thermocycler (Bio-Rad T-100™, USA). The amplified genes were sequenced in both  
174 directions by Sanger's chain termination method Sanger et al. (1977) using an Applied  
175 Biosystems automated sequencer (Bioserve, Hyderabad, India). The 16S rRNA gene  
176 sequences of the plant-associated *P. aeruginosa* strains (numbered PPA1 to PPA18)  
177 isolated and identified in the current study were submitted to NCBI GenBank (Accession  
178 no. MT734694 to MT734711).

179

### 180 **Repetitive element PCR based DNA fingerprinting analysis**

181 Primers complementary to the interspersed repetitive sequences (or repeated DNA  
182 elements) conserved within the prokaryotic genome are used for rep-PCR-based



183 fingerprinting (Versalovic et al. 1994). The conserved repetitive elements used for  
184 bacterial fingerprinting include Enterobacterial repetitive intergenic consensus (ERIC)  
185 and BOX element (BOX). The rep-PCR technique distinguishes the closely related  
186 bacterial strains.

187

188 **ERIC fingerprinting.** ERIC primers constitute oligonucleotides complementary to the  
189 conserved (126-bp) palindromic regions (Table 3; Versalovic et al. 1994). The amplified  
190 genomic DNA of the *P. aeruginosa* isolates were separated in 2% agarose gel and  
191 visualized their banding patterns in the Gel Doc™ XR+ documentation system (Bio-Rad,  
192 USA).

193

194 **BOX fingerprinting.** An oligonucleotide primer complementary to the conserved *boxA*  
195 (59 bp) segment was used for BOX fingerprinting analyses (Versalovic et al. 1994). The  
196 amplified genomic DNA from the PPA strains was resolved using 2% agarose gel and  
197 visualized in the Gel Doc™ XR+ documentation system (Bio-Rad, USA).

198

### 199 **Mineral solubilization**

200 The PPA strains were tested for their ability to solubilize the complex soil minerals to  
201 release the nutrients such as phosphorous, potassium, and zinc (Bunt and Rovira 1955;  
202 Sperber 1958; Hu et al. 2006). The cultures were grown in 10 ml LB broth overnight at  
203 37°C. The cell pellets were harvested and washed with 0.2 M phosphate buffer. The  
204 OD<sub>660</sub> was adjusted to 0.5 with sterile water. A 10 µl of the culture was spot inoculated  
205 into selective media with insoluble mineral sources.

206

207 Tri-calcium phosphate (Sperberg's apatite medium), potassium aluminum silicate  
208 (Alexandrov's medium), and zinc oxide (Bunt and Rovira medium) were used to test the  
209 phosphorous, potassium, and zinc solubilization potential, respectively (Bunt and Rovira  
210 1955; Sperber 1958; Hu et al. 2006). The plates were incubated for 48 h at 37°C and  
211 measured the diameter of the bacterial colonies and their inhibitory (halo) zones. The  
212 ability of our strains to solubilize the complex minerals was presented as solubilization  
213 index: Ratio of total diameter (colony + halo zone) to colony diameter (Edi-Premono et  
214 al. 1996).

215

#### 216 **Ammonification**

217 The ability of the isolates to fix atmospheric N into ammonia was tested using Nessler's  
218 reagent (Cappuccino and Sherman 1983; Goswami et al. 2014). Nessler's reagent  
219 consists of potassium tetraiodomercurate and potassium hydroxide which form an  
220 insoluble brown precipitate in the presence of ammonia.

221

222 The strains were inoculated in 2 ml of peptone broth and incubated at 37°C for 5 days  
223 under 100 rpm shaking. The culture supernatant was mixed with an equal volume of  
224 Nessler's reagent and vortexed. Absorbance ( $A_{450}$ ) of the brown insoluble mixture  
225 formed was measured using an ELISA reader (Spectramax® i3x, USA). The same  
226 procedure was repeated to generate the standard curve with ammonium sulfate (2  
227 mM to 10 mM). The concentration of ammonia (in mM) produced by individual strains  
228 was estimated by comparing against the standard curve.

229

#### 230 **Indole acetic acid**

231 The amount of indole-3 acetic acid (IAA) released into the medium was detected using  
232 Salkowski's reagent, which is a mixture of 35% perchloric acid and 5M ferric chloride  
233 (Gordon and Weber 1951). IAA reduces ferric compound resulting in pink coloration.

234

235 The bacterial strains were inoculated into 10 ml LB broth supplemented with 0.2 % L-  
236 tryptophan and incubated at 37°C under 125 rpm shaking for 7 days. The culture  
237 supernatant was mixed with two volumes of Salkowski's reagent, and the absorbance  
238 ( $A_{530}$ ) was quantified in a multi-mode microplate reader (Spectramax® i3x, USA). The  
239 same procedure was repeated to generate the standard curve with IAA (5 ppm to 100  
240 ppm). The concentration of IAA produced by individual strains was determined by  
241 comparing against the standard curve.

242

## 243 **Siderophore**

244 **Qualitative assay.** Siderophore production was qualitatively detected using chrome  
245 azurol S (CAS) agar medium (Schwyn and Neilands 1987). The CAS agar medium is  
246 made of chrome azurol S, hexadecyltrimethylammonium bromide, and iron(III) (colored  
247 dye-iron complex). The bacterial siderophores remove the iron(III) from this complex  
248 (iron chelation), leading to yellow coloration. All the strains were streaked on CAS agar  
249 medium and incubated overnight at 37°C. The formation of yellowish-orange zones  
250 around the colony is indicative of siderophore production.

251

252 **Quantitative assay.** The CAS-shuttle assay was performed for the siderophore  
253 estimation (Schwyn and Neilands 1987). The strains were grown overnight in succinate  
254 broth at 37°C. The cell-free supernatant was mixed with an equal volume of CAS

255 solution and incubated at room temperature for 1 h. The absorbance ( $A_{630}$ ) was  
256 measured using a spectrophotometer (Varian Cary® - 50, Australia). The percentage of  
257 siderophore is based on the equation  $[(A_r - A_s)/A_r] \times 100$ , where  $A_r$  is the  $A_{630}$  of reference  
258 (CAS assay solution and uninoculated media) and  $A_s$  is the  $A_{630}$  of the sample (CAS  
259 assay solution and culture supernatant) (Pérez-Miranda et al. 2007).

260

### 261 **Statistical analysis**

262 All data were subjected to a one-way analysis of variance (ANOVA) with a P-value of  
263 0.05 and Duncan's multiple range test was performed between individual means to  
264 reveal the significant difference (XLSTAT, version 2010.5.05 add-in with Windows Excel).  
265 Principal coordinate analysis (PCoA) based on Euclidean distance was carried out in  
266 NCSS 2020 statistical software (NCSS, Kaysville, USA). Primer 7 (Plymouth Routines in  
267 Multivariate Ecological Research, version 7; PRIMER-E, Plymouth, UK) was employed for  
268 non-metric multidimensional scaling of DNA fingerprints based on the Bray-Curtis  
269 similarity matrix (Clarke 1993). Data analysis and scientific graphing were done in  
270 OriginPro version 8.5 (OriginLab®, USA).

271

### 272 **Bioinformatics analysis**

273 The identity of 16S rRNA gene sequences of the PPA strains isolated in this study was  
274 determined by performing a BLASTN similarity search against PAO1 in the Pseudomonas  
275 database (<https://pseudomonas.com/blast/setnblast>; Winsor et al. (2016). The 16S  
276 rDNA sequence of ten plant-associated *P. aeruginosa* strains, KSG (Accession no:  
277 LN874213), MML2212 (Accession no: EU344794), KKR-B-P1 (Accession no: MW149279),  
278 MP1 (Accession no: MT937234), Ld-08 16S (Accession no: MT472133), VL4 (Accession no:

279 MN611376), AT5 (Accession no: MN636767), PA4 (Accession no: MN636761), SEGB6  
280 (Accession no: MN565979), and choltrans (Accession no: MK782058) and three clinical  
281 strains, PAO1 (Accession no: MT337602), ATCC10145 (Accession no: NR\_114471), and  
282 ATCC9027 (Accession no: NZ\_PDLX0000000) were retrieved from NCBI Genbank  
283 (<https://www.ncbi.nlm.nih.gov/genbank/>). Molecular Evolutionary Genetics Analysis  
284 (MEGA) 7.0 software was used for the constructing a phylogenetic tree (Kumar et al.,  
285 2016). The 16S rDNA sequences were used to create the tree and their evolutionary  
286 history was inferred using the Neighbor-Joining method (Saitou and Nei 1987). Their  
287 evolutionary distances were computed using the Maximum Composite Likelihood  
288 method (Tamura et al. 2004).

289

## 290 **Results**

### 291 **Isolation and screening**

292 Human transmission of *P. aeruginosa* through the consumption of raw vegetable salads  
293 was first reported in the '70s from the USA, followed by a single report in the '90s from  
294 Brazil (Kominos et al. 1972; Wright et al. 1976; Correa et al. 1991). The current research  
295 was undertaken to fill this three-decade gap in testing the edible crops as the source of  
296 *P. aeruginosa*. The crops tested in this study include rice, tomato, chili, and cucumber  
297 (salad vegetables), eggplant, and gourds. Samples from the rhizosphere and  
298 endophyte were plated in triplicates (for a total of 48 plates, 300 CFU/plate) in *P.*  
299 *aeruginosa* selective medium (Table 1). Of these, 300 putative *P. aeruginosa* isolates  
300 were sub-cultured in the same medium (data not shown). Out of 300, 63 isolates were  
301 selected based on the development of bluish green pigmentation indicative of

302 pyocyanin production, a *P. aeruginosa* biomarker (Gessard 1984; Alatraktchi et al.  
303 2020).

304

### 305 **Genus- and species-level identification**

306 The selected isolates were further screened using *P. aeruginosa* genus- (PA-GS-F/R) and  
307 species- (PA-SS-F/R) specific primers that would result in amplicons of 618 bp and 956  
308 bp, respectively (Table 2; Spilker et al. 2004). As expected, the three well-characterized  
309 *P. aeruginosa* strains, PAO1, ATCC10145, and ATCC9027, amplified 618 bp (Lane 19-21,  
310 respectively; Fig. 1A) and 956 bp (Lane 19-21, respectively; Fig. 1B) fragments with  
311 genus- and species-specific primers, respectively. As expected, there was no  
312 amplification in the controls, with no template (Lane 23; Fig 1A and B) and unrelated  
313 species *Enterobacter cloacae* (Lane 22; Fig 1A and B). After repeating the experiments  
314 for three times, out of the 63 isolates selected based on pyocyanin production (as  
315 observed on the plates), only 18 strains (29%) were amplifiable using *P. aeruginosa*  
316 genus- and species-specific primers (Lanes 1 to 18, Fig. 1A and B). The confirmed strains  
317 were from the rhizosphere and inner tissues (endophytes) of four plants (tomato, chili,  
318 cucumber, and eggplant) (Table 1). Henceforth these strains are referred to as plant-  
319 associated *P. aeruginosa* (PPA) 01 to 18 (from cucumber (PPA01 to 04), tomato (PPA05  
320 to 10), eggplant PPA11 to PP14, and chili (PPA15 to PP18)) (Table 3).

321

### 322 **Pyocyanin production**

323 The PPA strains were qualitatively screened for their ability to produce pyocyanin (Fig.  
324 2A). As controls, the three *P. aeruginosa* strains PAO1, ATCC10145, and ATCC9027 were

325 included. In this assay, low levels of fluorescence were observed for PPA01, PPA06,  
326 PPA09, and PPA12. High level of fluorescence was observed for the remaining strains.

327

328 All the strains were grown in glycine-alanine broth to induce pyocyanin release  
329 (Ingledew and Campbell 1969). The pyocyanin was quantified and expressed as  $\mu\text{g/ml}$   
330 (Fig. 2B). The significance of the values was analyzed using One-way ANOVA and DMRT  
331 (XLSTAT, version 2010.5.05). As expected, the control strains of *P. aeruginosa* released  
332 high levels of pyocyanin within 48 h of incubation (Fig. 2B). Except for one rhizospheric  
333 strain (PPA14), the rest produced significantly lower levels of pyocyanin. The pyocyanin  
334 produced by PPA14 is comparable to the control, ATCC10145 (designated by 'a').  
335 Except for one endophytic strain (PPA05), the rest produced pyocyanin comparable to  
336 the control strains PAO1 and ATCC9027. The four rhizospheric strains, PPA01, PPA06,  
337 PPA09, and PPA12, made low levels of pyocyanin (Fig. 2B) consistent with their low  
338 fluorescence seen in the plates (Fig. 2A). All PPA strains produced pyocyanin,  
339 indicating that they are indeed *P. aeruginosa*.

340

#### 341 **Sequence alignment of full-length 16S rRNA genes**

342 The complete length sequence (1500 bp) of 16SrDNA of the PPA strains were compared  
343 with the clinical strains (PAO1, ATCC10145, and ATCC9027) and previously identified  
344 plant-associated strains (from rice, guava, grass, pine, banana, lily, onion, ginseng and  
345 aloe vera) to determine their evolutionary relatedness. Sixteen of the PPA strains  
346 isolated in this study and nine of the agricultural strains from the previous studies had  
347 more than 97% sequence identity with PAO1 (Fig. 3). PPA08, and PPA15, isolated from  
348 tomato, and chili in this study, and SEGB6, isolated from guava in previous study

349 (Accession no: MN565979) showed less than 97% identity with PAO1. However, PPA08,  
350 and PPA15 were included for further analysis as they got amplified by the species-  
351 specific primers (Fig. 1B) and could produce pyocyanin (Fig. 2), the biomarker of *P.*  
352 *aeruginosa*.

353

354 *B. subtilis* was used as the outlier to create a phylogenetic tree using the Neighbor-  
355 Joining method (Fig. 3; Saitou and Nei (1987)) to study the evolutionary relatedness of  
356 the strains. Evolutionary distances of the strains were computed using the Maximum  
357 Composite Likelihood method (Tamura et al. 2004). The plant-associated strains  
358 clustered together with the clinical strains indicating their evolutionary relatedness (Fig.  
359 3). Three pairs of *P. aeruginosa* strains had 99% sequence identity and co-clustered;  
360 clinical strains (ATCC10145, and ATCC9027), eggplant rhizosphere strains (PPA13, and  
361 PPA14), and tomato endophytes (PPA05, and PPA07). *P. aeruginosa* strain AT5 from  
362 ginseng leaf, and strain MP1 from banana rhizosphere co-clustered regardless of their  
363 niches. In addition, one of the eggplant rhizosphere strain, PPA12 isolated in the current  
364 study clustered together with a previously identified guava leaf isolate. Phylogenetic  
365 analyses showed that the *P. aeruginosa* strains from different niches could have high  
366 relatedness based on their 16s DNA sequence.

367

### 368 **Molecular typing to determine genetic diversity**

369 The 18 *P. aeruginosa* isolates (PPA01 to PPA18) were fingerprinted using ERIC and BOX  
370 primers to determine their clonal diversity (Versalovic et al. 1994). The ERIC sequences  
371 are the conserved palindromic regions (126 bp) present in multiple copies within a  
372 bacterial genome (Wilson and Sharp 2006). The BOX sequences are repetitive elements



373 comprised of three areas, *boxA* (59 bp), *boxB* (45 bp), and *boxC* (50 bp) (Versalovic et  
374 al. 1994). The location of ERIC and BOX regions differ between the strains. These  
375 variations are exploited to reveal the strain-level genetic heterogeneity (Wilson and  
376 Sharp 2006).

377

378 The plant-associated and control *P. aeruginosa* strains (PAO1, ATCC10145, and  
379 ATCC9027) were amplified (Fig. 4A and B) using the ERIC (ERIC 2F/IR; Fig. 4A) and the  
380 BOX (BOXA1; Fig. 4B) primers (Table 3). None of the PPA strains had a similar fingerprint  
381 to the control strains (Lanes 19 to 21; Fig. 4A and B). Some of the PPA strains (PPA02,  
382 PPA04, PPA05, and PPA07) had visually similar fingerprints.

383

384 The fingerprint data were analyzed using multidimensional scaling (MDS) based on the  
385 Bray-Curtis similarity matrix (Clarke 1993) to determine the similarity between the strains  
386 (Fig. 4C). All three control strains, PAO1, ATCC10145, and ATCC9027, were scattered  
387 away from the plant-associated strains (Fig. 4C). The PPA strains clustered into three  
388 groups. Cluster A was made of three rhizospheric strains, PPA01, PPA12, and PPA15,  
389 from three different crops, cucumber, eggplant, and chili, respectively (Fig. 4C). Cluster  
390 B had a chili endophyte (PPA16) and two eggplant rhizospheric strains (PPA13 and  
391 PPA14). Cluster C had 11 PPA strains isolated from all four plants. All the rhizospheric  
392 and endophytic strains from the tomato plant co-clustered in one group (cluster 3).  
393 PPA18, the chili endophyte, had a unique fingerprint and did not cluster with any other  
394 strains. Fingerprinting data showed that the strains except for the tomato isolates did  
395 not cluster by their source (rhizosphere or endophyte). The tomato strains are more  
396 clonal than the others.

397 **Ability to solubilize complex soil minerals**

398 Plant growth-promoting rhizobacteria secrete organic acids to solubilize complex soil-  
399 bound minerals and release nutrients such as phosphorous, potassium, and zinc  
400 (Oleńska et al. 2020). The host plants absorb these nutrients for their growth and  
401 development. Thus, we postulated that the *P. aeruginosa* strains in an agricultural  
402 setting might promote plant growth by solubilizing complex soil minerals. The ability of  
403 the PPA strains to release phosphorous, potassium, and zinc was tested (Fig. 5). The  
404 three control isolates of human origin used in this study, PAO1, ATCC10145, and  
405 ATCC9027, were previously never tested for their ability to solubilize minerals.

406

407 **Phosphorous release.** The ability of *P. aeruginosa* strains (controls and PPAs) to release  
408 phosphorous from tri-calcium phosphate (insoluble mineral complex) was tested and  
409 presented as phosphorous solubilization index (PSI, Fig. 5A). *B. megaterium* var  
410 *phosphaticum* Pb1, a well-characterized phosphate solubilizing bacteria, was used as  
411 the positive control (Balamurugan and Gunasekaran 1996; Gomathy et al. 2007). As  
412 expected, obtained a high PSI value for the control (Bar 22; Fig. 5A). Human-  
413 associated *P. aeruginosa* strains, PAO1, ATCC10145, and ATCC9027, had a  
414 phosphorous solubilization index (PSI) similar to the control (Bars 19-21, respectively; Fig.  
415 5A). All the PPA strains solubilized tri-calcium phosphate at varying levels. One-way  
416 analysis of variance (ANOVA) and Duncan's multiple range test (DMRT) demonstrated  
417 that some of the PPA strains (Bars 2, 4, 15, and 16) had significantly lower PSI values. All  
418 the four tomato endophytes, PPA05, PPA07, PPA08, and PPA10, had comparably high  
419 PSI values as indicated by the shared letter 'd' (Fig. 5A). The PPA15 (chili rhizosphere)  
420 and PPA17 (chili endophyte) strains had the minimum (Bar 15) and maximum (Bar 17)

421 PSI values, respectively. Though this analysis only includes 18 strains, it appears that the  
422 top five PPA strains (PPA05, PPA07, PPA08, and PPA17) that had a high ability to release  
423 phosphorous were from the endophytic niche.

424

425 **Potassium release.** *P. aeruginosa* strains were tested for their ability to solubilize  
426 potassium aluminum silicate, and presented as potassium solubilization index (KSI, Fig.  
427 5B). As a control, well-characterized potassium releasing bacteria, *B. mucilaginous*  
428 KRB9 was used (Brindavathy and Gopaldaswamy 2017). As expected, the control strain  
429 had a high KSI value (Bar 22; Fig. 5B). One-way ANOVA and DMRT demonstrated that  
430 the KSI value of the control strain was significantly higher (indicated by letter 'a') than  
431 the *P. aeruginosa* strains. All the chili isolates had the ability to solubilize potassium  
432 aluminium silicate (Bars 15-18). Three endophytic PPA strains (Bar 5, 7, and 11) from  
433 tomato and eggplant and four rhizospheric PPA strains (Bar 1, 2, 6, and 12) from  
434 cucumber, tomato, and eggplant could not release potassium from the mineral  
435 complex. More importantly, the KSI of the tested human-associated *P. aeruginosa*  
436 isolates (Bar 19-21) was higher than that of PPA strains.

437

438 **Zinc release.** The zinc solubilization (ZS) potential of the *P. aeruginosa* strains was tested  
439 and presented as an index (ZSI, Fig. 5C). A well-characterized zinc-solubilizing  
440 bacterium *P. chlororaphis* ZSB15 was used as a control (Bowya and Balachandar 2020).  
441 Interestingly, the control strain had significantly lower ZSI (Bar 22) than 39% of the PPA  
442 strains (Bar 3, 8, 10, 14, 15, 16, and 17). The ZSI of the tomato endophyte PPA10 (Bar 10)  
443 was significantly higher than the control (Bar 22; Fig. 5C). Two tomato endophytes,  
444 (PPA05 and PPA07,) and the cucumber rhizosphere strain PPA04 could not solubilize

445 zinc oxide. The human-associated *P. aeruginosa* strains had very low ZSI values (Bar 19-  
446 21).

447

448 **Clustering based on mineral solubilization index.** Euclidean distance-based principal  
449 coordinate analysis (PCoA) (NCSS, Kaysville, USA) determined the similarity of *P.*  
450 *aeruginosa* strains based on their ability to solubilize the complex soil minerals. The *P.*  
451 *aeruginosa* controls (PAO1, ATCC10145, and ATCC9027) clustered away from the PPA  
452 strains (Fig. 5D). All the PPA strains were grouped into three clusters except for a  
453 cucumber rhizosphere strain, PPA04. Cluster A was occupied by two tomato  
454 endophytes (PPA05 and PPA07), an eggplant endophyte (PPA11), and a cucumber  
455 rhizosphere strain (PPA02). All the chili isolates (PPA15-PPA18) grouped in cluster B along  
456 with five other strains from cucumber, tomato, and eggplant. Cluster C had three  
457 endophytic strains from cucumber (PPA01), tomato (PPA06), and eggplant (PPA12). In  
458 the PCOA plot based on mineral solubilization properties, the PPA strains except for the  
459 chili isolates did not cluster by their plant source or niche (rhizosphere or endophyte).

460

#### 461 **Ammonification potential**

462 Terrestrial plants can neither access the gaseous form of nitrogen from the atmosphere  
463 nor the organic form of nitrogen from the soil. The plants solely depend on associated  
464 microbes to release ammonia (ammonification) and nitrate (nitrification) through the  
465 decomposition of soil organic matter (Oleńska et al. 2020). Thus, we hypothesized that  
466 the agricultural strains of *P. aeruginosa* might contribute to host plant growth through  
467 the nitrogen cycle.

468

469 Tested the ability of the *P. aeruginosa* strains to convert nitrogen into ammonia by  
470 quantifying the amount of ammonia released into peptone broth (Cappucino and  
471 Sherman, 1992). *B. altitudinis* FD48, a well characterized plant growth-promoting  
472 bacteria, was used as a control (Kumar et al. 2017; Ambreetha et al. 2018;  
473 Narayanasamy et al. 2020). All the strains can convert nitrogen to ammonia. The  
474 amount of ammonia released by the control (Fig. 6, FD48) was significantly lower than  
475 most of the *P. aeruginosa* strains (62%). The endophytes from cucumber (PPA03), and  
476 tomato (PPA08) had significantly higher ammonification activity as per ANOVA and  
477 DMRT analyses (indicated by 'a'). The top four ammonifiers in the PPA group (PPA03,  
478 PPA08, PPA10, and PPA18) were all from endophytic niches. Least ammonification was  
479 observed with two rhizospheric strains (PPA01, and PPA06 from cucumber, and tomato,  
480 respectively), and an eggplant endophyte, PPA11 (indicated by 'j', Fig. 6). *P.*  
481 *aeruginosa* ATCC10145 produced similar ammonia levels compared to the control  
482 strain FD48. However, *P. aeruginosa* ATCC9027 and PAO1 produced significantly higher  
483 ammonia levels. It appears that the ammonification potential is not dependent on the  
484 source of isolation. However, 63% of the strains that had high ammonification activity  
485 were endophytes.

486

#### 487 **Ability to release siderophores**

488 Iron is an essential element required by all living organisms, but its bioavailability is highly  
489 limited in the soil (Colombo et al. 2014). Microbes that could release siderophores  
490 scavenge the iron molecules from the soil leading to iron starvation and death of other  
491 competing counterparts (Leong 1986). Siderophore-producing microbes act as  
492 biocontrol agents by inhibiting the growth of soil-borne pathogens (Ghosh et al. 2020).

493 Microbial siderophores also induce plant immunity making their host plant disease-  
494 resistant (Aznar et al. 2014). In this study, it was hypothesized that plant-associated *P.*  
495 *aeruginosa* confers protection through siderophore production.

496

497 The ability of *P. aeruginosa* strains to release siderophores was qualitatively tested in  
498 chrome azurol S (CAS) agar medium (Schwyn and Neilands 1987).  
499 Hexadecyltrimethylammonium bromide, and iron(III) form a blue-colored dye-iron  
500 complex in CAS-containing agar medium. Siderophores from *P. aeruginosa* scavenges  
501 the iron(III) from this complex leading to yellow coloration. The formation of yellow zones  
502 confirmed the release of siderophores by all the tested strains (Fig. 7A). The amount of  
503 siderophore released was then quantified (Fig. 7B). The plant growth-promoting strain *B.*  
504 *altitudinis* FD48 was used as the positive control (Kumar et al. 2017; Ambreetha et al.  
505 2018; Narayanasamy et al. 2020). As expected, the control and all the strains produced  
506 siderophores (Fig. 7B). ANOVA and DMRT analyses determined the significant level of  
507 variations in siderophores released by the tested strains (strains that shared alphabets  
508 had no significant difference with each other, but significantly higher than the control  
509 strain). The levels of siderophore produced in most of the plant-associated *P.*  
510 *aeruginosa* strains (63%) were higher than the control. The tomato rhizosphere strain  
511 PPA09 hyperproduced siderophore (Indicated by 'a'). Similar to the plant isolates,  
512 there is a variation between human isolates in their ability to produce siderophores,  
513 PAO1 and ATCC10145 producing higher than the control. Both rhizospheric and  
514 endophytic *P. aeruginosa* isolates had the ability to release siderophores which likely  
515 benefits their host plants.

516

## 517 **Indole acetic acid production**

518 The natural auxin, indole acetic acid (IAA) is a phytohormone that plays a vital role in  
519 plant growth (Zhao 2010). Plants root exudates contain tryptophan that can be  
520 converted into IAA by the associated microbes (Kravchenko et al. 2004). Exogenous  
521 auxin released by the rhizospheric and endophytic bacteria contributes to cell division,  
522 cell elongation, improvement of the root architecture, and development of leaves,  
523 fruits, and flowers in the host plant (Sukumar et al. 2013; Ali et al. 2017; Ambreetha and  
524 Balachandar 2019). In other words, the plant-associated bacteria that can release  
525 auxin are considered beneficial to their host plants.

526

527 The ability of the plant-associated *P. aeruginosa* to convert exogenous tryptophan into  
528 IAA was investigated using Salkowski's reagent (Gordon and Weber 1951) and  
529 expressed as parts per million (ppm; Fig. 8). The statistical significance in the amount of  
530 IAA released was determined using the ANOVA and DMRT (strains that shared  
531 alphabets had no significant difference, Fig. 8). All strains, including the control *B.*  
532 *altitudinis* FD48, produced IAA. *P. aeruginosa* strains of non-plant origin had relatively  
533 lower levels of IAA than the control strain. Nearly 60% of the plant-associated strains  
534 released a higher amount of IAA than the control (PPA 02, 04, 05, 06, 07, 08, 09, 11, 15,  
535 16, and 18). The tomato rhizospheric strain PPA09 had the highest IAA levels, whereas  
536 eggplant-rhizosphere strains (PPA12, PPA13, and PPA14) had the lowest. Two  
537 rhizospheric cucumber strains, PPA02, and PPA04 had similar IAA production (indicated  
538 by 'b'). Endophytes from eggplant (PPA11) and chili (PPA16) released similar IAA levels  
539 (indicated by 'e'). In summary, both endophytic and rhizospheric *P. aeruginosa* isolates  
540 are capable of releasing extracellular IAA from tryptophan.

541

## 542 **Discussion**

543 Pseudomonads is the most abundant bacterial community in the soil (Janssen 2006)  
544 and in some areas nearly 78% of the Pseudomonads is *P. aeruginosa* (Noura et al. 2009).  
545 The initial assumption that *P. aeruginosa* inhabiting plants and humans are two different  
546 species was defenestrated by demonstrating the ability of clinical *P. aeruginosa* to  
547 colonize plants (Schroth et al. 1977; Schroth et al. 2018). Further, Alonso et al. (1999)  
548 have demonstrated that environmental isolates from oil-contaminated soil harbor  
549 virulence and antibiotic resistance similar to the clinical *P. aeruginosa* strains. However,  
550 there are limited molecular and biochemical evidence to prove the relatedness of  
551 human- and plant-associated *P. aeruginosa* strains. The current study reveals the  
552 shared evolutionary and functional attributes of clinical and agricultural isolates of *P.*  
553 *aeruginosa*. In addition, we also found that the clinical isolates tested here harbor plant  
554 growth-promoting capabilities.

555

### 556 ***P. aeruginosa* found in rhizosphere and internal tissues of vegetable plants**

557 Seven different edible plants (Table 3) grown in Southern India were tested for the  
558 presence of *P. aeruginosa*. Genus- and species-specific primers (Fig. 1) previously  
559 developed for clinical *P. aeruginosa* were used for molecular identification of the  
560 agricultural strains (Spilker et al. 2004). Eighteen different strains of *P. aeruginosa* were  
561 identified in rhizosphere and endophytic niches of cucumber, tomato, chili, and  
562 eggplant (Table 1). We could not detect *P. aeruginosa* in rice, which might be due to  
563 technical and sampling limitations. However, there are previous reports on the  
564 presence of *P. aeruginosa* in rice ecosystem (Shanmugaiah et al. 2010; Shi et al. 2015).

565



566 There have been regular reports on *P. aeruginosa* contamination in vegetables at  
567 supermarkets, hospital kitchens, canteens, and street vendors (Kominos et al. 1972;  
568 Wright et al. 1976; Correa et al. 1991; Viswanathan and Kaur 2001; Allydice-Francis and  
569 Brown 2012; Nithya and Babu 2017). Such contaminations could have occurred through  
570 different exposures during handling, processing, packing, transportation, or storage. A  
571 few *P. aeruginosa* strains have been previously isolated and characterized from chili  
572 (Linu et al. 2019) pepper (Kumar et al. 2013), tomato (Iasur Kruh et al. 2020), medicinal  
573 plant *Achyranthes aspera* L. (Devi et al. 2017), ginger (Jasim et al. 2014), reed (Wu et al.  
574 2018), chickpea (Mukherjee et al. 2020), aloe vera (Akinsanya et al. 2015), sugar cane  
575 (Singh et al. 2021), and wheat (Sun et al. 2021). In this study, we have found *P.*  
576 *aeruginosa* in rhizosperic and endophytic association with the vegetable plants  
577 harvested directly from the farm. In any case, the presence of human pathogens in  
578 fresh vegetables or their plants indicate the potential health hazard associated with  
579 agricultural produces (Berger et al. 2010; Al-Kharousi et al. 2016).

580

### 581 ***P. aeruginosa* can promote plant growth**

582 *P. aeruginosa* strains tested in this investigation had numerous plant growth-promoting  
583 attributes. They had the ability to solubilize complex soil minerals and release available  
584 form of nutrients (Fig. 5). The clinical strains could also solubilize all three mineral  
585 complexes (tri-calcium phosphate, potassium aluminium silicate, and zinc oxide) (Fig.  
586 5). Nearly 61% and 83% of the plant-associated strains released potassium and zinc,  
587 respectively, whereas all the PPA strains could release phosphorous from the tri-calcium  
588 phosphate (Fig. 5). *P. aeruginosa* strains with mineral solubilizing ability are known to  
589 improve the growth and productivity of vegetable crops such as green gram, tomato,

590 okra, and African spinach (Adesemoye et al. 2008; Ahemad and Khan 2010). Recently,  
591 use of mineral weathering bacteria is recommended to convert rocks and minerals into  
592 potential plant fertilizers (Ribeiro et al. 2020).

593

594 All the strains tested in this study had the ability to release siderophores and IAA which is  
595 likely to benefit the associated plants. Previous studies have demonstrated that  
596 siderophores and IAA released by *P. aeruginosa* improves seed germination, root length  
597 and shoot length, of the host plants (Sulochana et al. 2014; Sah et al. 2017). *P.*  
598 *aeruginosa* siderophores have been proven as effective inhibitors of plant pathogens  
599 such as *Fusarium oxysporum*, *Trichoderma herizum*, *Alternaria alternate*, and  
600 *Macrophomina phaseolina* (Bano and Musarrat 2003). Nearly 50% of the strains tested in  
601 this study released excessive levels of siderophores and IAA (Fig.7B and 8), which  
602 directly helps in plant growth-promotion and disease protection (Hariprasad et al. 2014;  
603 Marathe et al. 2017).

604

605 Pyocyanin, a redox-active phenazine compound was released by all the *P. aeruginosa*  
606 strains tested in this study (Fig. 2B). Pyocyanin accounts for 90% of this bacterium's  
607 biocontrol ability (Waksman and Woodruff 1940; Abou Raji El Feghali and Nawas 2018).  
608 It protects the host plants by inhibiting the growth of other soil pathogens (Anjaiah et al.  
609 2003; Mahmoud et al. 2016). In addition, pyocyanin triggers induced systemic resistance  
610 of the host plant against various fungal pathogens (Audenaert et al. 2002; De  
611 Vleeschauwer et al. 2006). In the current study, 77% of the endophytic strains and 33%  
612 of rhizospheric strains had high levels of pyocyanin (Fig. 2B). In eukaryotic organisms,  
613 pyocyanin is cytotoxic to the respiratory, urological, central nervous, and vascular

614 systems (Hall et al. 2016). However, the pyocyanin dosage required for plant protection  
615 is non-lethal to the eukaryotic cells (Priyaja et al. 2016). As most of the PPA strains had  
616 high pyocyanin and siderophore levels, their ability to inhibit bacterial and fungal  
617 phytopathogens will be tested in the future.

618

619 The three control isolates of human origin used in this study, PAO1, ATCC10145, and  
620 ATCC9027, were previously never tested for their ability to promote plant growth. These  
621 strains had the plant-beneficial traits comparable to the agricultural *P. aeruginosa* (Fig.  
622 5-8). This further argues for the evolutionary relatedness of the plant- and human-  
623 associated strains.

624

### 625 **Conflicting reports on agricultural *P. aeruginosa***

626 Previous studies have given conflicting reports on the interactions between *P.*  
627 *aeruginosa* and its host plant. Several studies have demonstrated that *P.*  
628 *aeruginosa* causes rot and wilt (Clara 1930; Elrod and Braun 1942; Cother et al. 1976; El-  
629 Said et al. 1982; Bradbury 1986; Gupta et al. 1986; Gao et al. 2014; Tiwari and Singh  
630 2017). On the other hand, plant-beneficial properties of agricultural *P. aeruginosa*,  
631 including a reduction in plant disease incidence have been reported in multiple  
632 investigations (Ali Siddiqui and Ehteshamul-Haque 2001; Adesemoye and Ugoji 2009;  
633 Yasmin et al. 2014; Radhapriya et al. 2015; Arif et al. 2016; Durairaj et al. 2017; Gupta  
634 and Buch 2019; Chandra et al. 2020).

635

636 Though, the two clinical strains, PAO1 and ATCC10145 used in the current study were  
637 initially isolated from burn wound and outer ear infection (Holloway 1955; Picard et al.

638 1994) they possessed plant-beneficial characteristics (Fig. 5-8). Likewise, there is a  
639 possibility for agricultural strains to harbor human virulence factors. Kumar et al. (2013)  
640 demonstrated that endophytic *P. aeruginosa* strains isolated from black pepper  
641 protected their host from fungus and nematode but they were cytotoxic to mammalian  
642 A549 cells, analogous to clinical strains. In 1980's it was demonstrated that both plant  
643 and human strains of *P. aeruginosa* could infect animals (Lebeda et al. 1984). The  
644 clinical *P. aeruginosa* strain, PA14 harbors conserved virulence factors that could elicit  
645 disease in both plant and animal system (Schroth et al. 1977; Rahme et al. 2000; He et  
646 al. 2004). In lieu of these findings, the use of *P. aeruginosa* in agricultural setting is not  
647 recommended. Despite their agricultural benefits, this bacterium could be a potential  
648 health hazard to farm workers, farm animals, and consumers. The ability of PPA strains  
649 to infect eukaryotic cells should be tested to determine the risk level associated with  
650 edible plants.

651

### 652 **Plant-associated *P. aeruginosa* evolutionary relatedness to clinical isolates**

653 16s rDNA-based phylogenetic tree revealed the evolutionary relatedness of the plant-  
654 and human-associated *P. aeruginosa*. Eighteen agricultural *P. aeruginosa* strains  
655 associated with cucumber, tomato, chili, and eggplant isolated in the current study,  
656 and ten strains from rice, guava, grass, pine, banana, lily, onion, ginseng, and aloe vera  
657 that were identified in previous studies clustered together with the human-pathogenic  
658 strains (Fig.3). Nearly 50% of these agricultural strains had more than 99% sequence  
659 similarity with the clinical isolate, PAO1. (Fig. 3). These results confirmed that plant- and  
660 human-associated *P. aeruginosa* are evolutionarily related. The current study supports

661 the findings based on biochemical evidence by Schroth and his associates four  
662 decades ago (Schroth et al. 1977).

663

664 Phylogenetic analyses also showed that the agricultural *P. aeruginosa* strains do not  
665 always cluster by their plant source. The plant-associated *P. aeruginosa* strains retrieved  
666 from NCBI had high sequence similarity to the PPA strains isolated in this study (Fig. 3).  
667 An eggplant isolate, PPA12, co-clustered with a different strain SEGB6 (Accession no:  
668 MN565979) that was previously isolated from guava leaf. The two PPA strains, PPA08,  
669 and PPA15 had less than 97% DNA similarity with other *P. aeruginosa* strains, but their  
670 biochemical characteristics did not set them apart (Fig. 5-8). Whole-genome sequence  
671 analysis of these strains may reveal their novel characteristics. Nevertheless, the current  
672 study is the first attempt at exploring the evolutionary relationship of plant-associated *P.*  
673 *aeruginosa* with the well-characterized clinical isolates.

674

#### 675 ***P. aeruginosa* strains did not cluster based on the plant source or niche**

676 DNA fingerprint profiles revealed the molecular heterogeneity within the plant-  
677 associated *P. aeruginosa* strains (Fig. 4C). All the strains except for tomato isolates did  
678 not cluster based on the plant source or niche (rhizospheric and endophytic). For  
679 instance, each of the four strains, PPA15-PPA18 isolated from the chili plant, was  
680 associated with different clusters exposing their genetic variations (Fig. 4C). The  
681 occurrence of genomic variability among strains within a habitat was previously  
682 reported for clinical and environmental *P. aeruginosa* using ERIC fingerprinting (Martins  
683 et al. 2014).

684

685 In the current investigation, the phenotypic behaviors of the strains were also not  
686 associated with their plant source or niche. In the biochemical studies, the PPA strains  
687 from similar niches had varying abilities (Fig. 5-8). All the tomato-associated strains had  
688 similar DNA fingerprints but varied in phenotypic properties (Fig. 4C and 5D). In  
689 contrast, the chili-associated strains that had diverse fingerprints showed similar  
690 phenotypic traits and clustered together (Fig. 4C and 5D). One of the reasons for the  
691 lack of strong association by niche is that these crops are regularly replanted or rotated  
692 to preserve the soil health (Venter et al. 2016).

693

694 *P. aeruginosa* generally exhibits high levels of genomic plasticity and nearly 10-20% of its  
695 chromosome is comprised of accessory genes (Kung et al. 2010; Klockgether et al.  
696 2011; Ozer et al. 2014; Pohl et al. 2014). This bacterium constantly evolves by acquiring  
697 new genetic segments from the environment through horizontal gene transfer (Shen et  
698 al. 2006; Mathee et al. 2008; Qiu et al. 2009; San Millan et al. 2015; Freschi et al. 2019).  
699 Multiple reports confirmed the within-patient patho-adaptive diversity of clinical *P.*  
700 *aeruginosa* (Wong et al. 2012; Jorth et al. 2015; Winstanley et al. 2016). The current study  
701 is the first of its kind to delineate the within-host genetic diversity of plant-associated *P.*  
702 *aeruginosa* isolates. Whole-genome sequencing and analysis would help to identify  
703 more precise genomic variations within these plant-associated strains.

704

705

706 **Concluding remarks**

707 In the current study, we have shown the occurrence of *P. aeruginosa* strains in  
708 association with the vegetable plants including tomato, and cucumber that are often  
709 consumed raw. These plant-associated strains share comparable genetic and  
710 metabolic characteristics with the clinical isolates. It is likely that these strains are  
711 pathogenic, and it would be a serious health menace to the farmworkers and  
712 consumers if they breach the innate immune system. Future work will focus on further  
713 characterizing the isolates for their ability to cause disease using animal models. In  
714 addition, whole-genome sequence and analysis may reveal their total virulence  
715 potential.

716

717

718 **Acknowledgement**

719 This work was not supported by any grant. SA was partially funded by the Fulbright  
720 Doctoral Nehru Research Fellowship by the U.S Department of State's Bureau of  
721 Educational and Cultural Affairs and United-States India Educational Foundation (ID.  
722 PS00299273). SA also received Science and Engineering Research Board-International  
723 Travel Support funded by the Department of Science and Technology, India (No:  
724 ITS\_2019\_002449). We thank Dr. Sriyutha Murthy (Indira Gandhi Centre for Atomic  
725 Research, Kalpakkam, Tamilnadu, India) for providing *P. aeruginosa* strain PAO1.

726

727 **Author Contributions**

728 The experiments were conceived and designed by SA and DB. The samples were  
729 processed by SA and PM, and the experiments were performed by SA. Critical analyses  
730 of the data were done by SA, KM and DB. The manuscript was prepared by SA and KM.  
731 Finally, all the authors were involved in the critical review of the paper.

732

733 **Ethical Approval**

734 There was no human or animal subjects involved in this study.

735

736 **Conflict of Interest**

737 The authors declare no conflict of interest.

738

739 **Data Availability**

740 All sequence data generated in this study were deposited in NCBI GenBank (Accession  
741 no. MT734694 to MT734711).

742



743 **References**

- 744 Abou Raji El Feghali, P. and Nawas, T. (2018) Pyocyanin: A powerful inhibitor of bacterial  
745 growth and biofilm formation. *Madridge J Case Rep Stud* **3**, 101-107.
- 746 Adesemoye, A.O., Obini, M. and Ugoji, E.O. (2008) Comparison of plant growth-  
747 promotion with *Pseudomonas aeruginosa* and *Bacillus subtilis* in three  
748 vegetables. *Braz J Microbiol* **39**, 423-426.
- 749 Adesemoye, A.O. and Ugoji, E.O. (2009) Evaluating *Pseudomonas aeruginosa* as plant  
750 growth-promoting rhizobacteria in West Africa. *Arch Phytopathol Pflanzenschutz*  
751 **42**, 188-200.
- 752 Ahemad, M. and Khan, M.S. (2010) Phosphate-solubilizing and plant-growth-promoting  
753 *Pseudomonas aeruginosa* PS1 improves greengram performance in quizalafop-  
754 p-ethyl and clodinafop amended soil. *Arch Environ Contam Toxicol* **58**, 361-372.
- 755 Akinsanya, M.A., Goh, J.K., Lim, S.P. and Ting, A.S.Y. (2015) Diversity, antimicrobial and  
756 antioxidant activities of culturable bacterial endophyte communities in *Aloe*  
757 *vera*. *FEMS Microbiol Lett* **362**, fnv184.
- 758 Al-Kharousi, Z.S., Guizani, N., Al-Sadi, A.M., Al-Bulushi, I.M. and Shaharoona, B. (2016)  
759 Hiding in fresh fruits and vegetables: Opportunistic pathogens may cross  
760 geographical barriers. *Int J Microbiol* **2016**, 4292417.
- 761 Alatraktchi, F.A.a., Svendsen, W.E. and Molin, S. (2020) Electrochemical detection of  
762 pyocyanin as a biomarker for *Pseudomonas aeruginosa*: A focused review.  
763 *Sensors* **20**, 5218.
- 764 Ali, S., Charles, T.C. and Glick, B.R. (2017) Endophytic phytohormones and their role in  
765 plant growth promotion. In *Functional Importance of the Plant Microbiome:  
766 Implications for Agriculture, Forestry and Bioenergy* ed. Doty, S.L. pp.89-105.  
767 Cham: Springer International Publishing.
- 768 Ali Siddiqui, I. and Ehteshamul-Haque, S. (2001) Suppression of the root rot–root knot  
769 disease complex by *Pseudomonas aeruginosa* in tomato: The influence of  
770 inoculum density, nematode populations, moisture and other plant-associated  
771 bacteria. *Plant Soil* **237**, 81-89.
- 772 Allydice-Francis, K. and Brown, P.D. (2012) Diversity of antimicrobial resistance and  
773 virulence determinants in *Pseudomonas aeruginosa* associated with fresh  
774 vegetables. *Int J Microbiol* **2012**, 426241.
- 775 Alonso, A., Rojo, F. and Martínez, J.L. (1999) Environmental and clinical isolates of  
776 *Pseudomonas aeruginosa* show pathogenic and biodegradative properties  
777 irrespective of their origin. *Environ Microbiol* **1**, 421-430.
- 778 Ambreetha, S. and Balachandar, D. (2019) Rhizobacteria-mediated root architectural  
779 improvement: A hidden potential for agricultural sustainability. In *Plant Growth  
780 Promoting Rhizobacteria for Agricultural Sustainability : From Theory to Practices*  
781 eds. Kumar, A. and Meena, V.S. pp.111-128. Singapore: Springer

- 782 Ambreetha, S., Chinnadurai, C., Marimuthu, P. and Balachandar, D. (2018) Plant-  
783 associated *Bacillus* modulates the expression of auxin-responsive genes of rice  
784 and modifies the root architecture. *Rhizosphere* **5**, 57-66.
- 785 Anjaiah, V., Cornelis, P. and Koedam, N. (2003) Effect of genotype and root  
786 colonization in biological control of fusarium wilts in pigeonpea and chickpea by  
787 *Pseudomonas aeruginosa* PNA1. *Can J Microbiol* **49**, 85-91.
- 788 Arif, M.S., Riaz, M., Shahzad, S.M., Yasmeen, T., Akhtar, M.J., Riaz, M.A., Jassey, V.E.J.,  
789 Bragazza, L. and Buttler, A. (2016) Associative interplay of plant growth  
790 promoting rhizobacteria (*Pseudomonas aeruginosa* QS40) with nitrogen fertilizers  
791 improves sunflower (*Helianthus annuus* L.) productivity and fertility of aridisol.  
792 *Appl Soil Ecol* **108**, 238-247.
- 793 Audenaert, K., Pattery, T., Cornelis, P. and Höfte, M. (2002) Induction of systemic  
794 resistance to *Botrytis cinerea* in tomato by *Pseudomonas aeruginosa* 7NSK2: Role  
795 of salicylic acid, pyochelin, and pyocyanin. *MPMI* **15**, 1147-1156.
- 796 Aznar, A., Chen, N.W.G., Rigault, M., Riache, N., Joseph, D., Desmaële, D., Mouille, G.,  
797 Boutet, S., Soubigou-Taconnat, L., Renou, J.-P., Thomine, S., Expert, D. and  
798 Dellagi, A. (2014) Scavenging iron: A novel mechanism of plant immunity  
799 activation by microbial siderophores. *Plant Physiol* **164**, 2167-2183.
- 800 Balamurugan, S. and Gunasekaran, S. (1996) Effect of combined inoculation of  
801 *Rhizobium* sp and phosphobacteria at different levels of phosphorus in  
802 groundnut. *Madras Agric J* **83**, 503-505.
- 803 Balasubramanian, D., Schneper, L., Kumari, H. and Mathee, K. (2012) A dynamic and  
804 intricate regulatory network determines *Pseudomonas aeruginosa* virulence.  
805 *Nucleic Acids Res* **41**, 1-20.
- 806 Banerjee, A. and Dangar, T.K. (1995) *Pseudomonas aeruginosa*, a facultative pathogen  
807 of red palm weevil, *Rhynchophorus ferrugineus*. *World J Microbiol Biotechnol* **11**,  
808 618-620.
- 809 Bano, N. and Musarrat, J. (2003) Characterization of a new *Pseudomonas aeruginosa*  
810 strain nj-15 as a potential biocontrol agent. *Curr Microbiol* **46**, 0324-0328.
- 811 Berger, C.N., Sodha, S.V., Shaw, R.K., Griffin, P.M., Pink, D., Hand, P. and Frankel, G.  
812 (2010) Fresh fruit and vegetables as vehicles for the transmission of human  
813 pathogens. *Environ Microbiol* **12**, 2385-2397.
- 814 Botzenhart, K. and Doring, G. (1993) Ecology and epidemiology of *Pseudomonas*  
815 *aeruginosa*. In *Pseudomonas aeruginosa as an opportunistic pathogen* eds.  
816 Campa, M., Bendinelli, M. and Friedman, H. pp.1-18. Boston, MA: Springer US.
- 817 Bowya, T. and Balachandar, D. (2020) Harnessing PGPR inoculation through exogenous  
818 foliar application of salicylic acid and microbial extracts for improving rice  
819 growth. *J Basic Microbiol* **60**, 950-961.
- 820 Bradbury, J.F. (1986) *Guide to plant pathogenic bacteria*. Kew, Surrey, UK: CAB  
821 International Mycological Institute.

- 822 Brindavathy, R. and Gopalaswamy, G. (2017) Effects of potassium releasing bacterium  
823 (KRB) with different levels of potash fertilizer in rice. *Trend Biosci* **10**, 9193-9198.
- 824 Bunt, J.S. and Rovira, A.D. (1955) Microbiological studies of some subantarctic soils. *J Soil*  
825 *Sci* **6**, 119-128.
- 826 Cappuccino, J.G. and Sherman, N. (1983) A laboratory manual. *Addision-1999*.
- 827 Cartwright, D.K., Chilton, W.S. and Benson, D.M. (1995) Pyrrolnitrin and phenazine  
828 production by *Pseudomonas cepacia*, strain 5.5B, a biocontrol agent of  
829 *Rhizoctonia solani*. *Appl Microbiol Biotechnol* **43**, 211-216.
- 830 Chandra, H., Kumari, P., Bisht, R., Prasad, R. and Yadav, S. (2020) Plant growth  
831 promoting *Pseudomonas aeruginosa* from *Valeriana wallichii* displays  
832 antagonistic potential against three phytopathogenic fungi. *Mol Biol Rep* **47**,  
833 6015-6026.
- 834 Cho, J., JJ, C. and SD, K. (1975) Ornamental plants as carriers of *Pseudomonas*  
835 *aeruginosa*. *Phytopathol* **65**, 425-431.
- 836 Clara, F. (1930) A new bacterial leaf disease of tobacco in the Philippines. *Phytopathol*  
837 **20**, 691-706.
- 838 Clarke, K.R. (1993) Non-parametric multivariate analyses of changes in community  
839 structure. *Aust J Ecol* **18**, 117-143.
- 840 Colombo, C., Palumbo, G., He, J.-Z., Pinton, R. and Cesco, S. (2014) Review on iron  
841 availability in soil: interaction of Fe minerals, plants, and microbes. *J Soils*  
842 *Sediments* **14**, 538-548.
- 843 Correa, C.M.C., Tibana, A. and Filho, P.P.G. (1991) Vegetables as a source of infection  
844 with *Pseudomonas aeruginosa* in a University and Oncology Hospital of Rio de  
845 Janeiro. *J Hosp Infect* **18**, 301-306.
- 846 Cother, E., Darbyshire, B. and Brewer, J. (1976) *Pseudomonas aeruginosa*: Cause of  
847 internal brown rot of onion. *Phytopathol* **66**, 828-834.
- 848 Curran, B., Morgan, J.A.W., Honeybourne, D. and Dowson, C.G. (2005) Commercial  
849 mushrooms and bean sprouts are a source of *Pseudomonas aeruginosa*. *J Clin*  
850 *Microbiol* **43**, 5830-5831.
- 851 De Meyer, G. and Höfte, M. (1997) Salicylic acid produced by the rhizobacterium  
852 *Pseudomonas aeruginosa* 7nsk2 induces resistance to leaf infection by *Botrytis*  
853 *cinerea* on bean. *Phytopathol* **87**, 588-593.
- 854 De Vleeschauwer, D., Cornelis, P. and Höfte, M. (2006) Redox-active pyocyanin  
855 secreted by *Pseudomonas aeruginosa* 7NSK2 triggers systemic resistance to  
856 *Magnaporthe grisea* but enhances *Rhizoctonia solani* Susceptibility in rice. *MPMI*  
857 **19**, 1406-1419.
- 858 Deredjian, A., Colinson, C., Hien, E., Brothier, E., Youenou, B., Cournoyer, B., Dequiedt, S.,  
859 Hartmann, A., Jolivet, C., Houot, S., Ranjard, L., Saby, N.P. and Nazaret, S. (2014)  
860 Low occurrence of *Pseudomonas aeruginosa* in agricultural soils with and  
861 without organic amendment. *Front Cell Infect Microbiol* **4**, 53.

- 862 Devi, K.A., Pandey, G., Rawat, A.K.S., Sharma, G.D. and Pandey, P. (2017) The  
863 endophytic symbiont—*Pseudomonas aeruginosa* stimulates the antioxidant  
864 activity and growth of *Achyranthes aspera* L. *Front Microbiol* **8**, 1-14.
- 865 Devnath, P., Uddin, M.K. and Aha, F. (2017) Extraction, purification and charact  
866 *Pseudomonas aeruginosa*. *Int Res J Biol Sci* **6**, 1-9.
- 867 Doustdar, F., Karimi, F., Abedinyfar, Z., Amoli, F.A. and Goudarzi, H. (2019) Genetic  
868 features of *Pseudomonas aeruginosa* isolates associated with eye infections  
869 referred to Farabi Hospital, Tehran, Iran. *Int Ophthalmol* **39**, 1581-1587.
- 870 Durairaj, K., Velmurugan, P., Park, J.-H., Chang, W.-S., Park, Y.-J., Senthilkumar, P., Choi,  
871 K.-M., Lee, J.-H. and Oh, B.-T. (2017) Potential for plant biocontrol activity of  
872 isolated *Pseudomonas aeruginosa* and *Bacillus stratosphericus* strains against  
873 bacterial pathogens acting through both induced plant resistance and direct  
874 antagonism. *FEMS Microbiol Lett* **364**, fnx225.
- 875 Edi-Premono, M., Moawad and PLG, V. (1996) Effect of phosphate solubilizing  
876 *Pseudomonas putida* on the growth of maize and its survival in the rhizosphere.  
877 *Indones J Crop Sci* **11**, 13-23.
- 878 El-Said, H., Gewaily, E., Salem, S. and Tohami, M. (1982) Biological and chemical control  
879 of *Pseudomonas aeruginosa*, the causal organism of blight disease of bean  
880 plant in Egypt. *Egypt J Microbiol* **17**, 65-80.
- 881 Elbadry, M., El-Bassel, A. and Elbanna, K. (1999) Occurrence and dynamics of  
882 phototrophic purple nonsulphur bacteria compared with other asymbiotic  
883 nitrogen fixers in ricefields of Egypt. *World J Microbiol Biotechnol* **15**, 359-362.
- 884 Elrod, R.P. and Braun, A.C. (1942) *Pseudomonas aeruginosa*: Its rôle as a plant  
885 pathogen. *J Bacteriol* **44**, 633-645.
- 886 Essar, D.W., Eberly, L., Hadero, A. and Crawford, I.P. (1990) Identification and  
887 characterization of genes for a second anthranilate synthase in *Pseudomonas*  
888 *aeruginosa*: interchangeability of the two anthranilate synthases and  
889 evolutionary implications. *J Bacteriol* **172**, 884-900.
- 890 Fasim, F., Ahmed, N., Parsons, R. and Gadd, G.M. (2002) Solubilization of zinc salts by a  
891 bacterium isolated from the air environment of a tannery. *FEMS Microbiol Lett*  
892 **213**, 1-6.
- 893 Freschi, L., Vincent, A.T., Jeukens, J., Emond-Rheault, J.-G., Kukavica-Ibrulj, I., Dupont,  
894 M.-J., Charette, S.J., Boyle, B. and Levesque, R.C. (2019) The *Pseudomonas*  
895 *aeruginosa* pan-genome provides new insights on its population structure,  
896 horizontal gene transfer, and pathogenicity. *Genome Biol Evol* **11**, 109-120.
- 897 Gao, J., Wang, Y., Wang, C.W. and Lu, B.H. (2014) First report of bacterial root rot of  
898 ginseng caused by *Pseudomonas aeruginosa* in China. *Plant Dis* **98**, 1577-1577.
- 899 Gardner, J.M., Feldman, A.W. and Zablutowicz, R.M. (1982) Identity and behavior of  
900 xylem-residing bacteria in rough lemon roots of florida citrus trees. *Appl Environ*  
901 *Microbiol* **43**, 1335-1342.

- 902 Gessard, C. (1984) On the blue and green coloration that appears on bandages. *Rev*  
903 *Infect Dis* **6**, S775-S776.
- 904 Ghosh, S.K., Bera, T. and Chakrabarty, A.M. (2020) Microbial siderophore – A boon to  
905 agricultural sciences. *Biol Control* **144**, 104214.
- 906 Gomathy, M., Thangaraju, M., Gunasekaran, S. and Gopal, N.O. (2007) Sporulation and  
907 regeneration efficiency of phosphobacteria (*Bacillus megaterium* var  
908 *phosphaticum*). *Indian J Microbiol* **47**, 259-262.
- 909 Gordon, S.A. and Weber, R.P. (1951) Colorimetric estimation of indoleacetic acid. *Plant*  
910 *Physiol* **26**, 192-195.
- 911 Goswami, D., Dhandhukia, P., Patel, P. and Thakker, J.N. (2014) Screening of PGPR from  
912 saline desert of Kutch: Growth promotion in *Arachis hypogea* by *Bacillus*  
913 *licheniformis* A2. *Microbiol Res* **169**, 66-75.
- 914 Green, S.K., Schroth, M.N., Cho, J.J., Kominos, S.D. and Vitanza-Jack, V.B. (1974)  
915 Agricultural plants and soil as a reservoir for *Pseudomonas aeruginosa*. *Appl*  
916 *Microbiol* **28**, 987-991.
- 917 Gupta, R., Usha, M. and Pandey, U. (1986) Bacterial brown rot of onion in storage—a new  
918 record from India. *Indian J Plant Pathol* **4**, 184.
- 919 Gupta, V. and Buch, A. (2019) *Pseudomonas aeruginosa* predominates as multifaceted  
920 rhizospheric bacteria with combined abilities of P-solubilization and biocontrol. *J*  
921 *Pure Appl Microbiol* **13**, 319-328.
- 922 Hall, S., McDermott, C., Anoopkumar-Dukie, S., McFarland, A.J., Forbes, A., Perkins, A.V.,  
923 Davey, A.K., Chess-Williams, R., Kiefel, M.J., Arora, D. and Grant, G.D. (2016)  
924 Cellular effects of pyocyanin, a secreted virulence factor of *Pseudomonas*  
925 *aeruginosa*. *Toxins* **8**, 236-244.
- 926 Hariprasad, P., Chandrashekar, S., Singh, S.B. and Niranjana, S.R. (2014) Mechanisms of  
927 plant growth promotion and disease suppression by *Pseudomonas aeruginosa*  
928 strain Zapa. *J Basic Microbiol* **54**, 792-801.
- 929 Haynes, W.C. (1951) *Pseudomonas aeruginosa*—its characterization and identification.  
930 *Microbiol* **5**, 939-950.
- 931 He, J., Baldini, R.L., Déziel, E., Saucier, M., Zhang, Q., Liberati, N.T., Lee, D., Urbach, J.,  
932 Goodman, H.M. and Rahme, L.G. (2004) The broad host range pathogen  
933 *Pseudomonas aeruginosa* strain PA14 carries two pathogenicity islands harboring  
934 plant and animal virulence genes. *PNAS* **101**, 2530-2535.
- 935 Holloway, B.W. (1955) Genetic recombination in *Pseudomonas aeruginosa*. *J Gen*  
936 *Microbiol* **13**, 572-581.
- 937 Hu, X., Chen, J. and Guo, J. (2006) Two phosphate- and potassium-solubilizing bacteria  
938 isolated from Tianmu Mountain, Zhejiang, China. *World J Microbiol Biotechnol* **22**,  
939 983-990.
- 940 Iasur Kruh, L., Bari, V.K., Abu-Nassar, J., Lidor, O. and Aly, R. (2020) Characterization of an  
941 endophytic bacterium (*Pseudomonas aeruginosa*), originating from tomato

- 942           (*Solanum lycopersicum* L.), and its ability to inhabit the parasitic weed  
943           *Phelipanche aegyptiaca*. *Plant Signal Behav* **15**, 1766292.
- 944 Illmer, P. and Schinner, F. (1992) Solubilization of inorganic phosphates by  
945           microorganisms isolated from forest soils. *Soil Biol Biochem* **24**, 389-395.
- 946 Ingledew, W.M. and Campbell, J.J. (1969) A new resuspension medium for pyocyanine  
947           production. *Can J Microbiol* **15**, 595-598.
- 948 Janssen, P.H. (2006) Identifying the dominant soil bacterial taxa in libraries of 16S rRNA  
949           and 16S rRNA Genes. *Appl Environ Microbiol* **72**, 1719-1728.
- 950 Jasim, B., Anisha, C., Rohini, S., Kurian, J.M., Jyothis, M. and Radhakrishnan, E.K. (2014)  
951           Phenazine carboxylic acid production and rhizome protective effect of  
952           endophytic *Pseudomonas aeruginosa* isolated from *Zingiber officinale*. *World J*  
953           *Microbiol Biotechnol* **30**, 1649-1654.
- 954 Jha, B.K., Gandhi Pragash, M., Cletus, J., Raman, G. and Sakthivel, N. (2009)  
955           Simultaneous phosphate solubilization potential and antifungal activity of new  
956           fluorescent pseudomonad strains, *Pseudomonas aeruginosa*, *P. plecoglossicida*  
957           and *P. mosselii*. *World J Microbiol Biotechnol* **25**, 573-581.
- 958 Jorth, P., Staudinger, Benjamin J., Wu, X., Hisert, K.B., Hayden, H., Garudathri, J., Harding,  
959           Christopher L., Radey, Matthew C., Rezayat, A., Bautista, G., Berrington,  
960           William R., Goddard, Amanda F., Zheng, C., Angermeyer, A., Brittnacher,  
961           Mitchell J., Kitzman, J., Shendure, J., Fligner, Corinne L., Mittler, J., Aitken, Moira L.,  
962           Manoil, C., Bruce, James E., Yahr, Timothy L. and Singh, Pradeep K. (2015)  
963           Regional isolation drives bacterial diversification within cystic fibrosis lungs. *Cell*  
964           *Host Microbe* **18**, 307-319.
- 965 Kim, B.S., Lee, J.Y. and Hwang, B.K. (2000) *In vivo* control and *in vitro* antifungal activity  
966           of rhamnolipid B, a glycolipid antibiotic, against *Phytophthora capsici* and  
967           *Colletotrichum orbiculare*. *Pest Manag Sci* **56**, 1029-1035.
- 968 King, E.O., Ward, M.K. and Raney, D.E. (1954) Two simple media for the demonstration  
969           of pyocyanin and fluorescin. *J Lab Clin Med* **44**, 301-307.
- 970 Klockgether, J., Cramer, N., Wiehlmann, L., Davenport, C. and Tümmler, B. (2011)  
971           *Pseudomonas aeruginosa* genomic structure and diversity. *Front Microbiol* **2**.
- 972 Kloepper, J.W., Leong, J., Teintze, M. and Schroth, M.N. (1980) *Pseudomonas*  
973           *siderophores*: A mechanism explaining disease-suppressive soils. *Curr Microbiol* **4**,  
974           317-320.
- 975 Kominos, S.D., Copeland, C.E., Grosiak, B. and Postic, B. (1972) Introduction of  
976           *Pseudomonas aeruginosa* into a hospital via vegetables. *Appl Microbiol* **24**, 567-  
977           570.
- 978 Kravchenko, L.V., Azarova, T.S., Makarova, N.M. and Tikhonovich, I.A. (2004) The effect  
979           of tryptophan present in plant root exudates on the phytostimulating activity of  
980           Rhizobacteria. *Microbiol* **73**, 156-158.

- 981 Kumar, A., Munder, A., Aravind, R., Eapen, S.J., Tümmmler, B. and Raaijmakers, J.M. (2013)  
982 Friend or foe: genetic and functional characterization of plant endophytic  
983 *Pseudomonas aeruginosa*. *Environ Microbiol* **15**, 764-779.
- 984 Kumar, A.S., Sridar, R. and Uthandi, S. (2017) Mitigation of drought in rice by a  
985 phyllosphere bacterium *Bacillus altitudinis* FD48. *Afr J Microbiol Res* **11**, 1614-1625.
- 986 Kung, V.L., Ozer, E.A. and Hauser, A.R. (2010) The accessory genome of *Pseudomonas*  
987 *aeruginosa*. *MMBR* **74**, 621-641.
- 988 Kurachi, M. (1958) Studies on the biosynthesis of pyocyanine.(II): Isolation and  
989 determination of pyocyanine. *Bulletin of the Institute for Chemical Research,*  
990 *Kyoto University* **36**, 174-187.
- 991 Lebeda, A., Kudela, V. and Jedlickova, Z. (1984) Pathogenicity of *Pseudomonas*  
992 *aeruginosa* for plants and animals. *Acta Phytopathol Acad Sci Hung* **19**, 271-284.
- 993 Leong, J. (1986) Siderophores: their biochemistry and possible role in the biocontrol of  
994 plant pathogens. *Annu Rev Phytopathol* **24**, 187-209.
- 995 Linu, M.S., Asok, A.K., Thampi, M., Sreekumar, J. and Jisha, M.S. (2019) Plant growth  
996 promoting traits of indigenous phosphate solubilizing *Pseudomonas aeruginosa*  
997 isolates from chilli (*Capsicum annum* L.) rhizosphere. *Commun Soil Sci Plant Anal*  
998 **50**, 444-457.
- 999 Mahmoud, S.Y., Ziedan, E.-S.H., Farrag, E.S., Kalafalla, R.S. and Ali, A.M. (2016) Antifungal  
1000 activity of pyocyanin produced by *Pseudomonas aeruginosa* against *Fusarium*  
1001 *oxysporum* Schlech phytopathogenic fungi. *Int J PharmTech Res* **9**, 43-50.
- 1002 Marathe, R., Phatake, Y., Shaikh, A., Shinde, B. and Gajbhiye, M. (2017) Effect of IAA  
1003 produced by *Pseudomonas aeruginosa* 6a (bc4) on seed germination and plant  
1004 growth of *Glycin max*. *J Exp Biol Agric Sci* **5**, 351-358.
- 1005 Martins, V.V., Pitondo-Silva, A., de Melo Manço, L., Falcão, J.P., Freitas, S.d.S., da Silveira,  
1006 W.D. and Stehling, E.G. (2014) Pathogenic potential and genetic diversity of  
1007 environmental and clinical isolates of *Pseudomonas aeruginosa*. *APMIS* **122**, 92-  
1008 100.
- 1009 Mathee, K. (2018) Forensic investigation into the origin of *Pseudomonas aeruginosa*  
1010 PA14 — old but not lost. *J Med Microbiol* **67**, 1019-1021.
- 1011 Mathee, K., Narasimhan, G., Valdes, C., Qiu, X., Matewish, J.M., Koehrsen, M., Rokas, A.,  
1012 Yandava, C.N., Engels, R., Zeng, E., Olavarietta, R., Doud, M., Smith, R.S.,  
1013 Montgomery, P., White, J.R., Godfrey, P.A., Kodira, C., Birren, B., Galagan, J.E.  
1014 and Lory, S. (2008) Dynamics of *Pseudomonas aeruginosa* genome evolution.  
1015 *PNAS* **105**, 3100-3105.
- 1016 Melody, S.C. (1997) *Plant Molecular Biology - A laboratory manual*. New York, USA:  
1017 Springer-Verlag Berlin Heidelberg.
- 1018 Mondal, K.K., Mani, C., Singh, J., Dave, S.R., Tipre, D.R., Kumar, A. and Trivedi, B.M. (2012)  
1019 Fruit rot of tinda caused by *Pseudomonas aeruginosa*—A new report from India.  
1020 *Plant Dis* **96**, 141-141.

- 1021 Moradali, M.F., Ghods, S. and Rehm, B.H.A. (2017) *Pseudomonas aeruginosa* lifestyle: A  
1022 paradigm for adaptation, survival, and persistence. *Front Cell Infect Microbiol* **7**,  
1023 1-29.
- 1024 Mukherjee, A., Singh, B.K. and Verma, J.P. (2020) Harnessing chickpea (*Cicer arietinum*  
1025 L.) seed endophytes for enhancing plant growth attributes and bio-controlling  
1026 against *Fusarium* sp. *Microbiol Res* **237**, 126469.
- 1027 Narayanasamy, S., Thangappan, S. and Uthandi, S. (2020) Plant growth-promoting  
1028 *Bacillus* sp. cahoots moisture stress alleviation in rice genotypes by triggering  
1029 antioxidant defense system. *Microbiol Res* **239**, 126518.
- 1030 Nithya, A. and Babu, S. (2017) Prevalence of plant beneficial and human pathogenic  
1031 bacteria isolated from salad vegetables in India. *BMC Microbiol* **17**, 64.
- 1032 Noura, Salih, K.M., Jusuf, N.H., Hamid, A.A. and Yusoff, W.M.W. (2009) High prevalence  
1033 of *Pseudomonas* species in soil samples from Ternate Island-Indonesia. *Pak J Biol*  
1034 *Sci* **12**, 1036-1040.
- 1035 Obaton, M., Amarger, N. and Alexander, M. (1968) Heterotrophic nitrification by  
1036 *Pseudomonas aeruginosa*. *Arch Microbiol* **63**, 122-132.
- 1037 Oleńska, E., Matek, W., Wójcik, M., Swiecicka, I., Thijs, S. and Vangronsveld, J. (2020)  
1038 Beneficial features of plant growth-promoting rhizobacteria for improving plant  
1039 growth and health in challenging conditions: A methodical review. *Sci Total*  
1040 *Environ* **743**, 140682.
- 1041 Ozer, E.A., Allen, J.P. and Hauser, A.R. (2014) Characterization of the core and  
1042 accessory genomes of *Pseudomonas aeruginosa* using bioinformatic tools Spine  
1043 and AGEnt. *BMC Genomics* **15**, 737.
- 1044 Picard, B., Denamur, E., Barakat, A., Elion, J. and Goulet, P. (1994) Genetic  
1045 heterogeneity of *Pseudomonas aeruginosa* clinical isolates revealed by esterase  
1046 electrophoretic polymorphism and restriction fragment length polymorphism of  
1047 the ribosomal RNA gene region. *J Med Microbiol* **40**, 313-322.
- 1048 Pohl, S., Klockgether, J., Eckweiler, D., Khaledi, A., Schniederjans, M., Chouvarine, P.,  
1049 Tümmler, B. and Häussler, S. (2014) The extensive set of accessory *Pseudomonas*  
1050 *aeruginosa* genomic components. *FEMS Microbiol Lett* **356**, 235-241.
- 1051 Priyaja, P., Jayesh, P., Philip, R. and Singh, I.B. (2016) Pyocyanin induced in vitro oxidative  
1052 damage and its toxicity level in human, fish and insect cell lines for its selective  
1053 biological applications. *Cytotechnology* **68**, 143-155.
- 1054 Qiu, X., Kulasekara, B. and Lory, S. (2009) Role of horizontal gene transfer in the evolution  
1055 of *Pseudomonas aeruginosa* virulence. In *Microbial Pathogenomics*. pp.126-139:  
1056 Karger Publishers.
- 1057 Radford, R., Brahma, A., Armstrong, M. and Tullo, A.B. (2000) Severe sclerokeratitis due  
1058 to *Pseudomonas aeruginosa* in non-contact-lens wearers. *Eye* **14**, 3-7.
- 1059 Radhapriya, P., Ramachandran, A., Anandham, R. and Mahalingam, S. (2015)  
1060 *Pseudomonas aeruginosa* RRALC3 enhances the biomass, nutrient and carbon



- 1061 contents of pongamia pinnata seedlings in degraded forest soil. *Plos One* **10**,  
1062 e0139881.
- 1063 Rahme, L., Stevens, E., Wolfort, S., Shao, J., Tompkins, R. and Ausubel, F. (1995) Common  
1064 virulence factors for bacterial pathogenicity in plants and animals. *Science* **268**,  
1065 1899-1902.
- 1066 Rahme, L.G., Ausubel, F.M., Cao, H., Drenkard, E., Goumnerov, B.C., Lau, G.W.,  
1067 Mahajan-Miklos, S., Plotnikova, J., Tan, M.-W., Tsongalis, J., Walendziewicz, C.L.  
1068 and Tompkins, R.G. (2000) Plants and animals share functionally common  
1069 bacterial virulence factors. *PNAS* **97**, 8815-8821.
- 1070 Reyes, E.A., Bale, M.J., Cannon, W.H. and Matsen, J.M. (1981) Identification of  
1071 *Pseudomonas aeruginosa* by pyocyanin production on Tech agar. *J Clin*  
1072 *Microbiol* **13**, 456-458.
- 1073 Reynolds, H.Y., Levine, A.S., Wood, A.E., Zierdt, C.H., Dale, D.C. and E., P. (1975)  
1074 *Pseudomonas aeruginosa* infections: Persisting problems and current research to  
1075 find new therapies. *Ann Intern Med* **82**, 819-831.
- 1076 Ribeiro, I.D.A., Volpiano, C.G., Vargas, L.K., Granada, C.E., Lisboa, B.B. and Passaglia,  
1077 L.M.P. (2020) Use of mineral weathering bacteria to enhance nutrient availability  
1078 in crops: A review. *Front Plant Sci* **11**, 590774-590774.
- 1079 Rosenthal, V.D., Bat-Erdene, I., Gupta, D., Belkebir, S., Rajhans, et al. (2020) International  
1080 Nosocomial Infection Control Consortium (INICC) report, data summary of 45  
1081 countries for 2012-2017: Device-associated module. *Am J Infect* **48**, 423-432.
- 1082 Roychowdhury, R., Qaiser, T.F., Mukherjee, P. and Roy, M. (2019) Isolation and  
1083 characterization of a *Pseudomonas aeruginosa* strain PGP for plant growth  
1084 promotion. *Proc Natl Acad Sci India, Sect B Biol Sci* **89**, 353-360.
- 1085 Sah, S., Singh, N. and Singh, R. (2017) Iron acquisition in maize (*Zea mays* L.) using  
1086 *Pseudomonas siderophore*. *3 Biotech* **7**, 121-121.
- 1087 Saitou, N. and Nei, M. (1987) The neighbor-joining method: a new method for  
1088 reconstructing phylogenetic trees. *Mol Biol Evol* **4**, 406-425.
- 1089 San Millan, A., Toll-Riera, M., Qi, Q. and MacLean, R.C. (2015) Interactions between  
1090 horizontally acquired genes create a fitness cost in *Pseudomonas aeruginosa*.  
1091 *Nat Commun* **6**, 6845.
- 1092 Sanger, F., Nicklen, S. and Coulson, A.R. (1977) DNA sequencing with chain-terminating  
1093 inhibitors. *PNAS* **74**, 5463-5467.
- 1094 Schroth, M., Cho, J., Green, S. and Kominos, S. (1977) Epidemiology of *Pseudomonas*  
1095 *aeruginosa* in agricultural areas [Soil and plants serve as the natural and  
1096 permanent reservoirs for the bacterium]. In *Pseudomonas aeruginosa: Ecological*  
1097 *aspects and patient colonization* ed. Young, V. pp.1-29: New York: Raven Press.
- 1098 Schroth, M.N., Cho, J.J., Green, S.K., Kominos, S.D. and Publishing, M.S. (2018)  
1099 Epidemiology of *Pseudomonas aeruginosa* in agricultural areas. *J Med Microbiol*  
1100 **67**, 1191-1201.

- 1101 Schwyn, B. and Neilands, J.B. (1987) Universal chemical assay for the detection and  
1102 determination of siderophores. *Anal Biochem* **160**, 47-56.
- 1103 Shanmugaiah, V., Mathivanan, N. and Varghese, B. (2010) Purification, crystal structure  
1104 and antimicrobial activity of phenazine-1-carboxamide produced by a growth-  
1105 promoting biocontrol bacterium, *Pseudomonas aeruginosa* MML2212. *J Appl*  
1106 *Microbiol* **108**, 703-711.
- 1107 Shen, K., Sayeed, S., Antalis, P., Gladitz, J., Ahmed, A., Dice, B., Janto, B., Dopico, R.,  
1108 Keefe, R., Hayes, J., Johnson, S., Yu, S., Ehrlich, N., Jocz, J., Kropp, L., Wong, R.,  
1109 Wadowsky, R.M., Slifkin, M., Preston, R.A., Erdos, G., Post, J.C., Ehrlich, G.D. and  
1110 Hu, F.Z. (2006) Extensive genomic plasticity in *Pseudomonas aeruginosa* revealed  
1111 by identification and distribution studies of novel genes among clinical isolates.  
1112 *Infect Immun* **74**, 5272-5283.
- 1113 Shi, Z., Ren, D., Hu, S., Hu, X., Wu, L., Lin, H., Hu, J., Zhang, G. and Guo, L. (2015) Whole  
1114 genome sequence of *Pseudomonas aeruginosa* F9676, an antagonistic  
1115 bacterium isolated from rice seed. *J Biotechnol* **211**, 77-78.
- 1116 Singh, P., Singh, R.K., Guo, D.J., Sharma, A., Singh, R.N., Li, D.P., Malviya, M.K., Song, X.P.,  
1117 Lakshmanan, P., Yang, L.T. and Li, Y.R. (2021) Whole genome analysis of  
1118 sugarcane root-associated endophyte *Pseudomonas aeruginosa* B18-A plant  
1119 growth-promoting bacterium with antagonistic potential against *Sporisorium*  
1120 *scitamineum*. *Front Microbiol* **12**, 628376.
- 1121 Sperber, J. (1958) Solution of apatite by soil microorganisms producing organic acids.  
1122 *Aust J Agr Res* **9**, 782-787.
- 1123 Spilker, T., Coenye, T., Vandamme, P. and LiPuma, J.J. (2004) PCR-based assay for  
1124 differentiation of *Pseudomonas aeruginosa* from other pseudomonas species  
1125 recovered from cystic fibrosis patients. *J Clin Microbiol* **42**, 2074-2079.
- 1126 Sukumar, p., legué, v., vayssières, a., martin, f., tuskan, g.a. and Kalluri, u.c. (2013)  
1127 Involvement of auxin pathways in modulating root architecture during beneficial  
1128 plant-microorganism interactions. *Plant Cell Environ* **36**, 909-919.
- 1129 Sulochana, M.B., Jayachandra, S.Y., Kumar, S.A., Parameshwar, A.B., Reddy, K.M. and  
1130 Dayanand, A. (2014) Siderophore as a potential plant growth-promoting agent  
1131 produced by *Pseudomonas aeruginosa* JAS-25. *Appl Biochem Biotechnol* **174**,  
1132 297-308.
- 1133 Sun, X., Xu, Y., Chen, L., Jin, X. and Ni, H. (2021) The salt-tolerant phenazine-1-  
1134 carboxamide-producing bacterium *Pseudomonas aeruginosa* NF011 isolated  
1135 from wheat rhizosphere soil in dry farmland with antagonism against *Fusarium*  
1136 *graminearum*. *Microbiol Res* **245**, 126673.
- 1137 Tamura, K., Nei, M. and Kumar, S. (2004) Prospects for inferring very large phylogenies by  
1138 using the neighbor-joining method. *PNAS* **101**, 11030-11035.
- 1139 Tate, D., Mawer, S. and Newton, A. (2003) Outbreak of *Pseudomonas aeruginosa*  
1140 folliculitis associated with a swimming pool inflatable. *Epidemiol Infect* **130**, 187-  
1141 192.

- 1142 Tiwari, P. and Singh, J.S. (2017) A plant growth promoting rhizospheric pseudomonas  
1143 aeruginosa strain inhibits seed germination in *Triticum aestivum* (L) and *Zea mays*  
1144 (L). *Microbiol Res* **8**, 7233.
- 1145 Turner, J.M. and Messenger, A.J. (1986) Occurrence, Biochemistry and Physiology of  
1146 Phenazine Pigment Production. In *Advances in Microbial Physiology* eds. Rose,  
1147 A.H. and Tempest, D.W. pp.211-275: Academic Press.
- 1148 Van Soestbergen, A.A. and Lee, C.H. (1969) Pour plates or streak plates? *Appl Microbiol*  
1149 **18**, 1092-1093.
- 1150 Venter, Z.S., Jacobs, K. and Hawkins, H.-J. (2016) The impact of crop rotation on soil  
1151 microbial diversity: A meta-analysis. *Pedobiologia* **59**, 215-223.
- 1152 Versalovic, J., Schneider, M., De Bruijn, F.J. and Lupski, J.R. (1994) Genomic fingerprinting  
1153 of bacteria using repetitive sequence-based polymerase chain reaction.  
1154 *Method Mol Cell Biol* **5**, 25-40.
- 1155 Viswanathan, P. and Kaur, R. (2001) Prevalence and growth of pathogens on salad  
1156 vegetables, fruits and sprouts. *Int J Hyg Environ Health* **203**, 205-213.
- 1157 Von Graevenitz, A. (1977) The role of opportunistic bacteria in human disease. *Annu*  
1158 *Rev Microbiol* **31**, 447-471.
- 1159 Waksman, S.A. and Woodruff, H.B. (1940) The soil as a source of microorganisms  
1160 antagonistic to disease-producing bacteria. *J Bacteriol* **40**, 581-600.
- 1161 Weisburg, W.G., Barns, S.M., Pelletier, D.A. and Lane, D.J. (1991) 16S ribosomal DNA  
1162 amplification for phylogenetic study. *J Bacteriol* **173**, 697-703.
- 1163 Wilson, L.A. and Sharp, P.M. (2006) Enterobacterial Repetitive Intergenic Consensus  
1164 (ERIC) sequences in *Escherichia coli*: Evolution and implications for ERIC-PCR. *Mol*  
1165 *Biol Evol* **23**, 1156-1168.
- 1166 Winsor, G.L., Griffiths, E.J., Lo, R., Dhillon, B.K., Shay, J.A. and Brinkman, F.S. (2016)  
1167 Enhanced annotations and features for comparing thousands of *Pseudomonas*  
1168 genomes in the *Pseudomonas* genome database. *Nucleic Acids Res* **44**, D646-  
1169 653.
- 1170 Winstanley, C., O'Brien, S. and Brockhurst, M.A. (2016) *Pseudomonas aeruginosa*  
1171 evolutionary adaptation and diversification in cystic fibrosis chronic lung  
1172 infections. *Trends Microbiol* **24**, 327-337.
- 1173 Wong, A., Rodrigue, N. and Kassen, R. (2012) Genomics of Adaptation during  
1174 experimental evolution of the opportunistic pathogen *Pseudomonas aeruginosa*.  
1175 *PLOS Genetics* **8**, e1002928.
- 1176 Wright, C., Kominos, S.D. and Yee, R.B. (1976) Enterobacteriaceae and *Pseudomonas*  
1177 *aeruginosa* recovered from vegetable salads. *Appl Environ Microbiol* **31**, 453-454.
- 1178 Wu, T., Xu, J., Xie, W., Yao, Z., Yang, H., Sun, C. and Li, X. (2018) *Pseudomonas*  
1179 *aeruginosa* L10: A hydrocarbon-degrading, biosurfactant-producing, and plant-  
1180 growth-promoting endophytic bacterium isolated from a reed (*Phragmites*  
1181 *australis*). *Front Microbiol* **9**, 1087.

- 1182 Yasmin, S., Hafeez, F.Y. and Rasul, G. (2014) Evaluation of *Pseudomonas aeruginosa* Z5  
1183 for biocontrol of cotton seedling disease caused by *Fusarium oxysporum*.  
1184 *BioControl Sci Techn* **24**, 1227-1242.
- 1185 Zhao, Y. (2010) Auxin biosynthesis and its role in plant development. *Annu Rev Plant Biol*  
1186 **61**, 49-64.

**Table 1. Number of *P. aeruginosa* isolates screened in this study**

| <b>Ecosystem</b> | <b>Crop</b>              | <b>Initial No. of isolates</b> | <b>No. of isolates<br/>Morphological screening</b> | <b>No. of isolates<br/>Molecular screening</b> |   |
|------------------|--------------------------|--------------------------------|----------------------------------------------------|------------------------------------------------|---|
| Orchard          | Cucumber rhizosphere     | 21                             | 8                                                  | 3                                              |   |
|                  | Cucumber endophyte       | 15                             | 4                                                  | 1                                              |   |
|                  | Tomato rhizosphere       | 10                             | 3                                                  | 2                                              |   |
|                  | Tomato endophyte         | 23                             | 6                                                  | 4                                              |   |
|                  | Eggplant rhizosphere     | 35                             | 9                                                  | 3                                              |   |
|                  | Eggplant endophyte       | 16                             | 7                                                  | 1                                              |   |
|                  | Chili rhizosphere        | 28                             | 6                                                  | 1                                              |   |
|                  | Chili endophyte          | 22                             | 4                                                  | 3                                              |   |
|                  | Bottle gourd rhizosphere | 26                             | 4                                                  | 0                                              |   |
|                  | Bottle gourd endophyte   | 32                             | 2                                                  | 0                                              |   |
|                  | Bitter gourd rhizosphere | 11                             | 1                                                  | 0                                              |   |
|                  | Bitter gourd endophyte   | 15                             | 4                                                  | 0                                              |   |
|                  | Wetland                  | Rice rhizosphere               | 26                                                 | 2                                              | 0 |
|                  |                          | Rice endophyte                 | 20                                                 | 3                                              | 0 |
|                  | Total isolates           | 300                            | 63                                                 | 18                                             |   |

**Table 2. Details of primers used in the study**

| <b>Target</b>                    | <b>Primer</b> | <b>Sequence (5' - 3')</b> | <b>Annealing</b> | <b>Amplicon</b> | <b>Reference</b>       |
|----------------------------------|---------------|---------------------------|------------------|-----------------|------------------------|
| 16s rDNA (Eubacteria)            | FD1           | AGAGTTTGATCCTGGCTCAG      | 55°C             | 1500 bp         | Weisburg et al. 1991   |
|                                  | RP2           | ACGGCTACCTTGTTACGACTT     |                  |                 |                        |
| Genus ( <i>Pseudomonas</i> )     | PA-GS-F       | GACGGGTGAGTAATGCCTA       | 54°C             | 618 bp          | Spilker et al. 2004    |
|                                  | PA-GS-R       | CACTGGTGTTCCCTCCTATA      |                  |                 |                        |
| Species ( <i>P. aeruginosa</i> ) | PA-SS-F       | GGGGGATCTTCGGACCTCA       | 58°C             | 956 bp          | Spilker et al. 2004    |
|                                  | PA-SS-R       | TCCTTAGAGTGCCACCCG        |                  |                 |                        |
| DNA fingerprinting               | ERIC2F        | AAGTAAGTGACTGGGGTGAGCG    | 46°C             | -               | Versalovic et al. 1994 |
|                                  | ERIC1R        | ATGTAAGCTCCTGGGGATTAC     |                  |                 |                        |
|                                  | BOXA1         | CTACGGCAAGGCGACGCTGACG    | 52°C             | -               | Versalovic et al. 1994 |

**Table 3. Bacterial strains used in the study**

| <b>Bacteria</b>                                          | <b>Source</b> | <b>Infection/Niche</b> | <b>References</b>                   |
|----------------------------------------------------------|---------------|------------------------|-------------------------------------|
| <b><i>Pseudomonas aeruginosa</i> (reference strains)</b> |               |                        |                                     |
| PAO1                                                     | Human         | Wound infection        | Holloway, (1955)                    |
| ATCC9027                                                 | Human         | Otitis externa         | Haynes, (1951)                      |
| ATCC10145                                                | Human         | Unknown                | Picard et al. (1994)                |
| <b>Plant beneficial bacteria (reference strains)</b>     |               |                        |                                     |
| <i>Bacillus alitudinus</i> , FD48                        | Rice          | Phyllosphere           | Kumar et al. (2017)                 |
| <i>Bacillus megaterium</i> var <i>phosphaticum</i> , Pb1 | Soil          | Rhizosphere            | Balamurugan and Gunasekaran, (1996) |
| <i>Paenibacillus mucilaginosus</i> , KRB9                | Soil          | Rhizosphere            | Brindavathy and Gopalaswamy, (2014) |
| <i>Pseudomonas chlororaphis</i> strain, ZSB15            | Rice          | Rhizoplane             | Bowya and Balachandar, (2020)       |
| <b>Plant-associated <i>P. aeruginosa</i> strains</b>     |               |                        |                                     |
| PPA01                                                    | Cucumber      | Rhizosphere            | This study                          |
| PPA02                                                    | Cucumber      | Rhizosphere            | This study                          |
| PPA03                                                    | Cucumber      | Endophyte              | This study                          |
| PPA04                                                    | Cucumber      | Rhizosphere            | This study                          |
| PPA05                                                    | Tomato        | Endophyte              | This study                          |
| PPA06                                                    | Tomato        | Rhizosphere            | This study                          |
| PPA07                                                    | Tomato        | Endophyte              | This study                          |
| PPA08                                                    | Tomato        | Endophyte              | This study                          |
| PPA09                                                    | Tomato        | Rhizosphere            | This study                          |
| PPA10                                                    | Tomato        | Endophyte              | This study                          |
| PPA11                                                    | Eggplant      | Endophyte              | This study                          |
| PPA12                                                    | Eggplant      | Rhizosphere            | This study                          |
| PPA13                                                    | Eggplant      | Rhizosphere            | This study                          |
| PPA14                                                    | Eggplant      | Rhizosphere            | This study                          |
| PPA15                                                    | Chili         | Rhizosphere            | This study                          |
| PPA16                                                    | Chili         | Endophyte              | This study                          |
| PPA17                                                    | Chili         | Endophyte              | This study                          |
| PPA18                                                    | Chili         | Endophyte              | This study                          |

**Fig. 1**

**A**

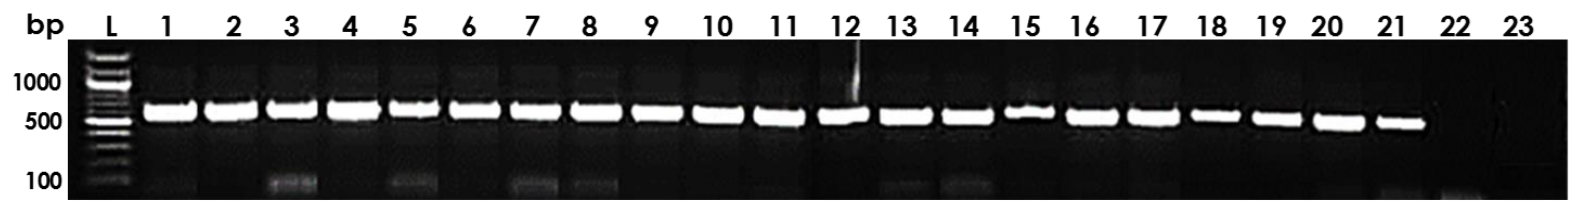

**B**

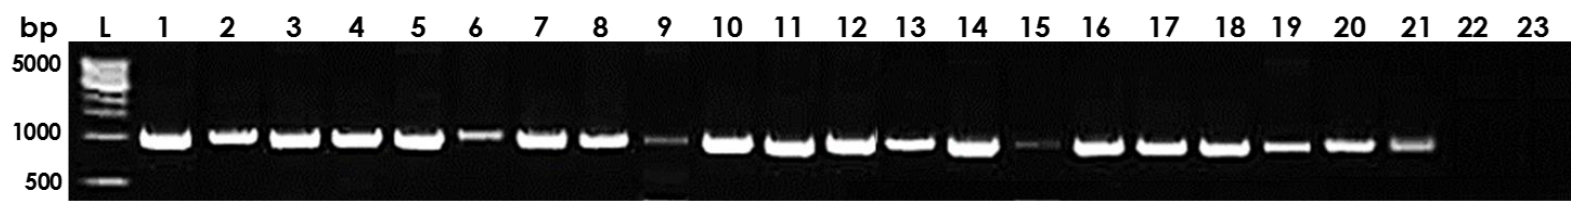

**C**

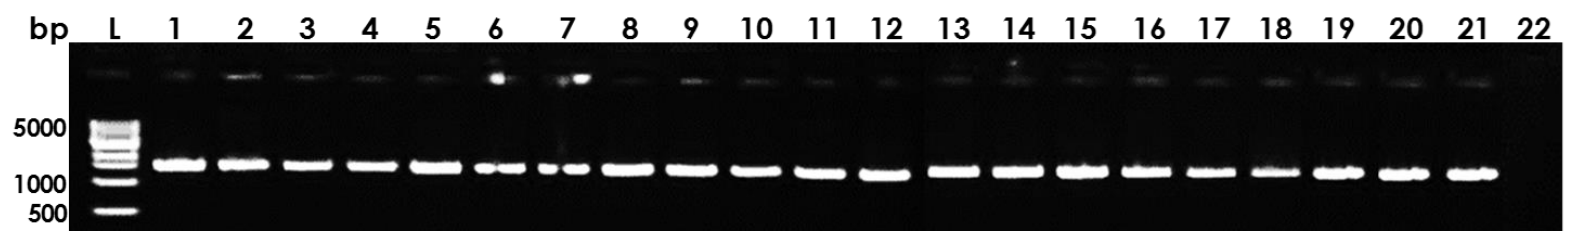



**Fig. 2**

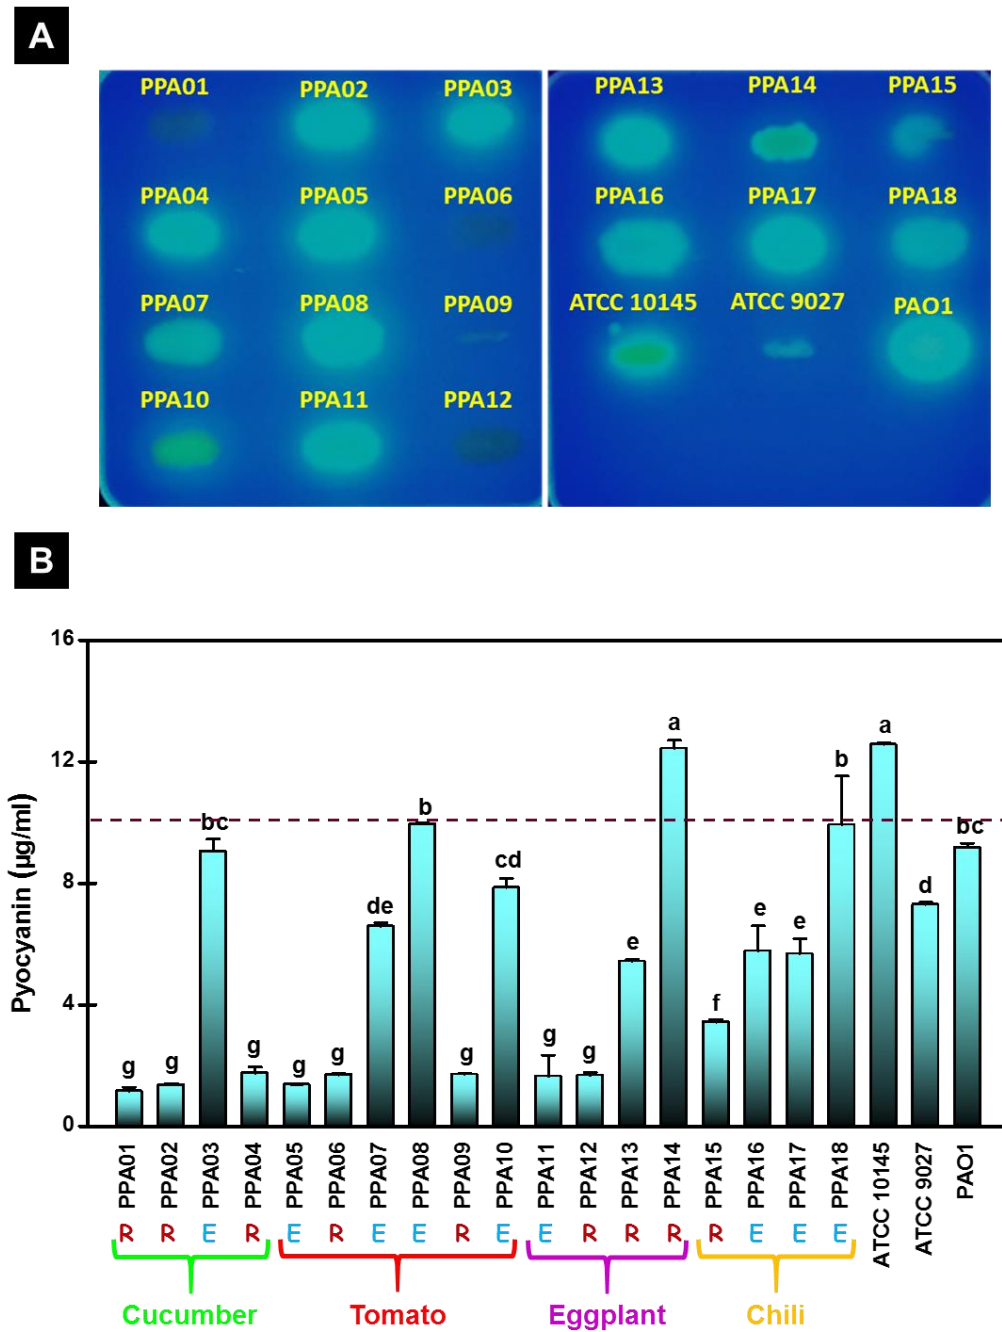

**Fig. 3**

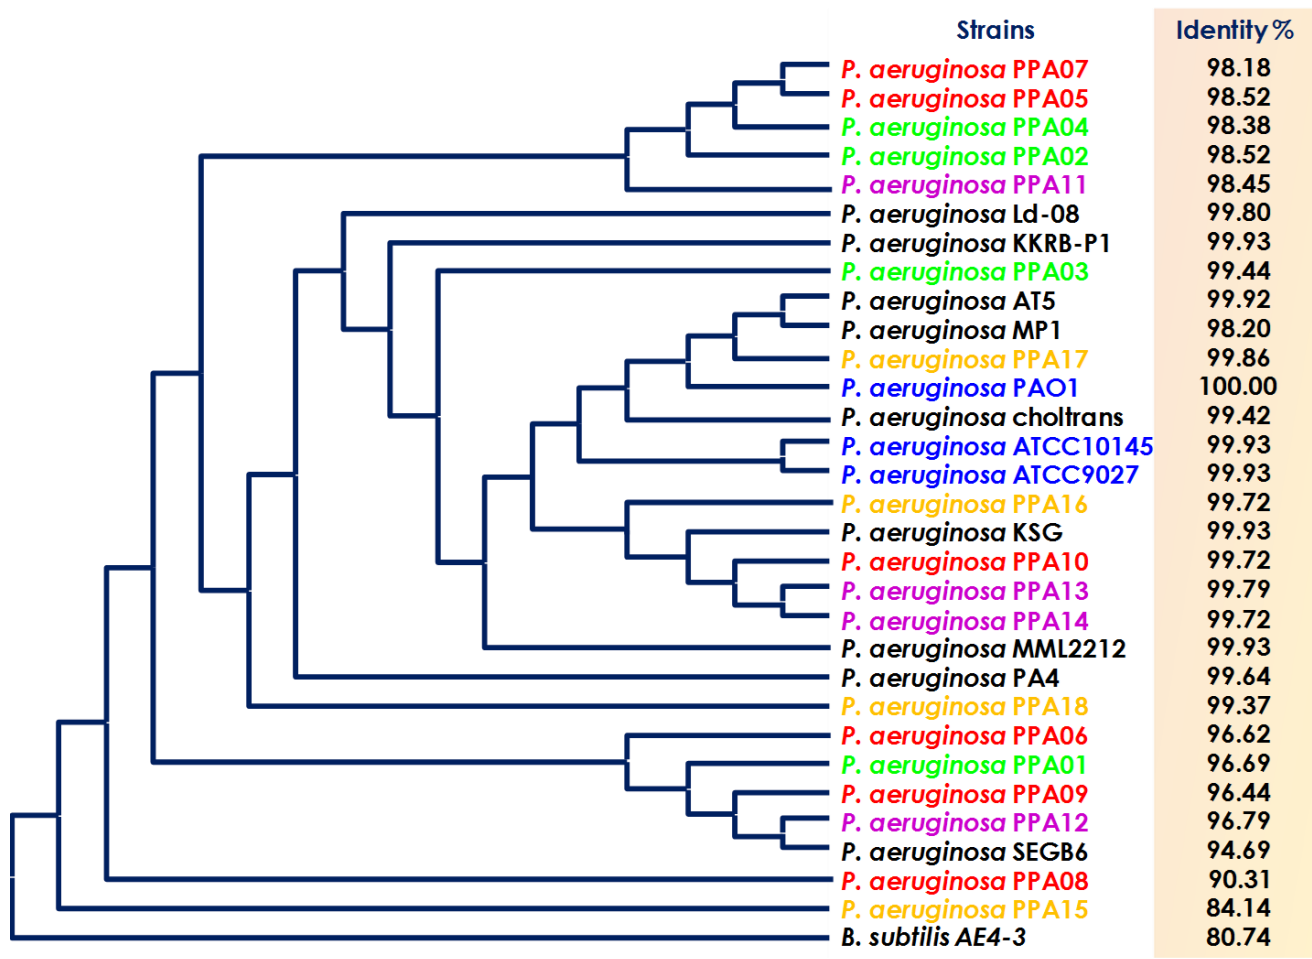

**A**

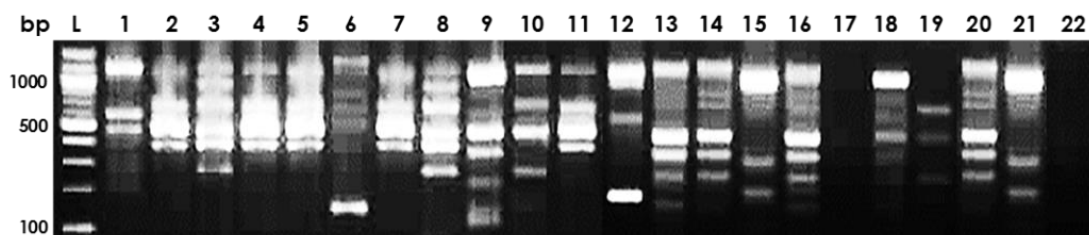

**Fig. 4**

**B**

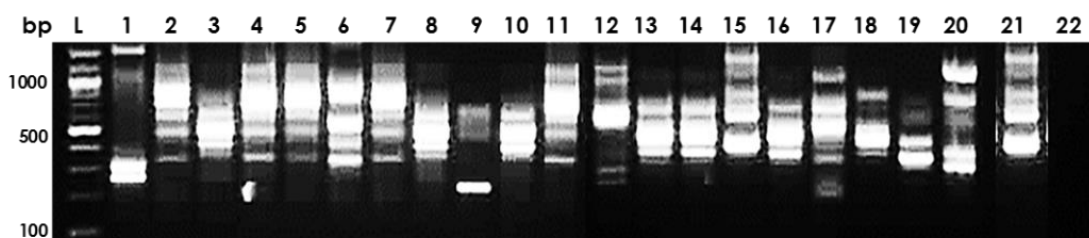

**C**

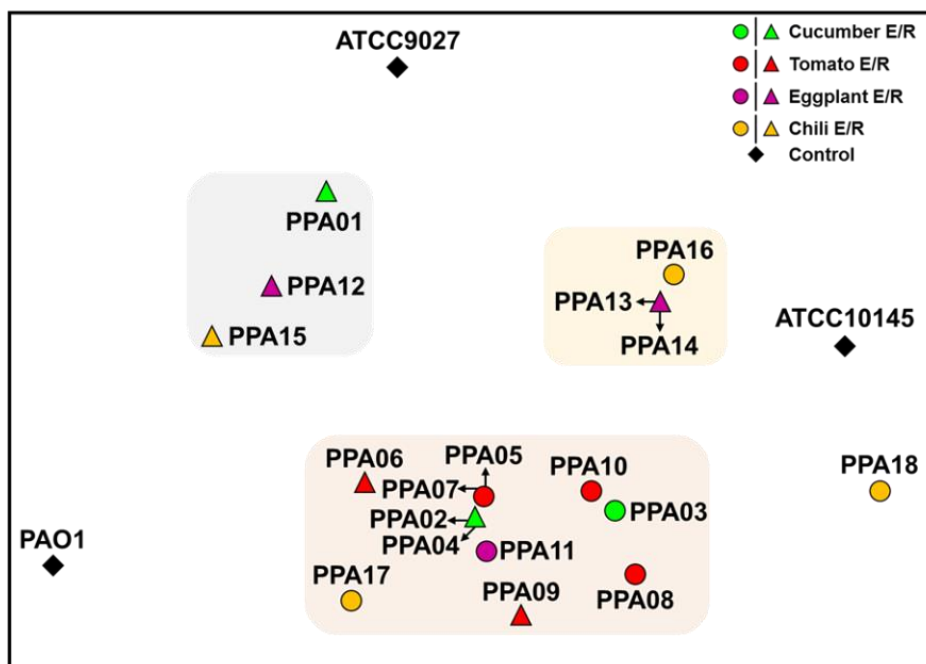

**Fig. 5**

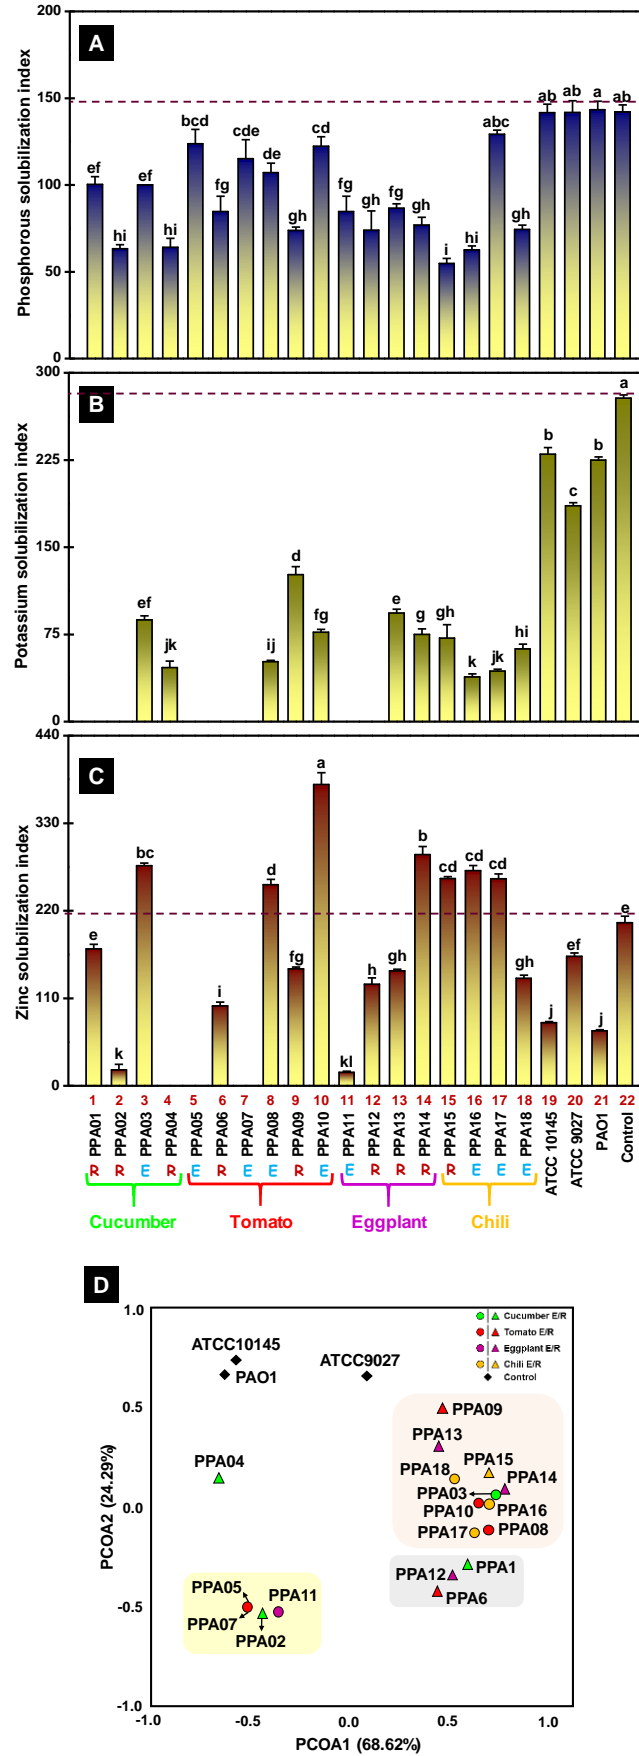

**Fig. 6**

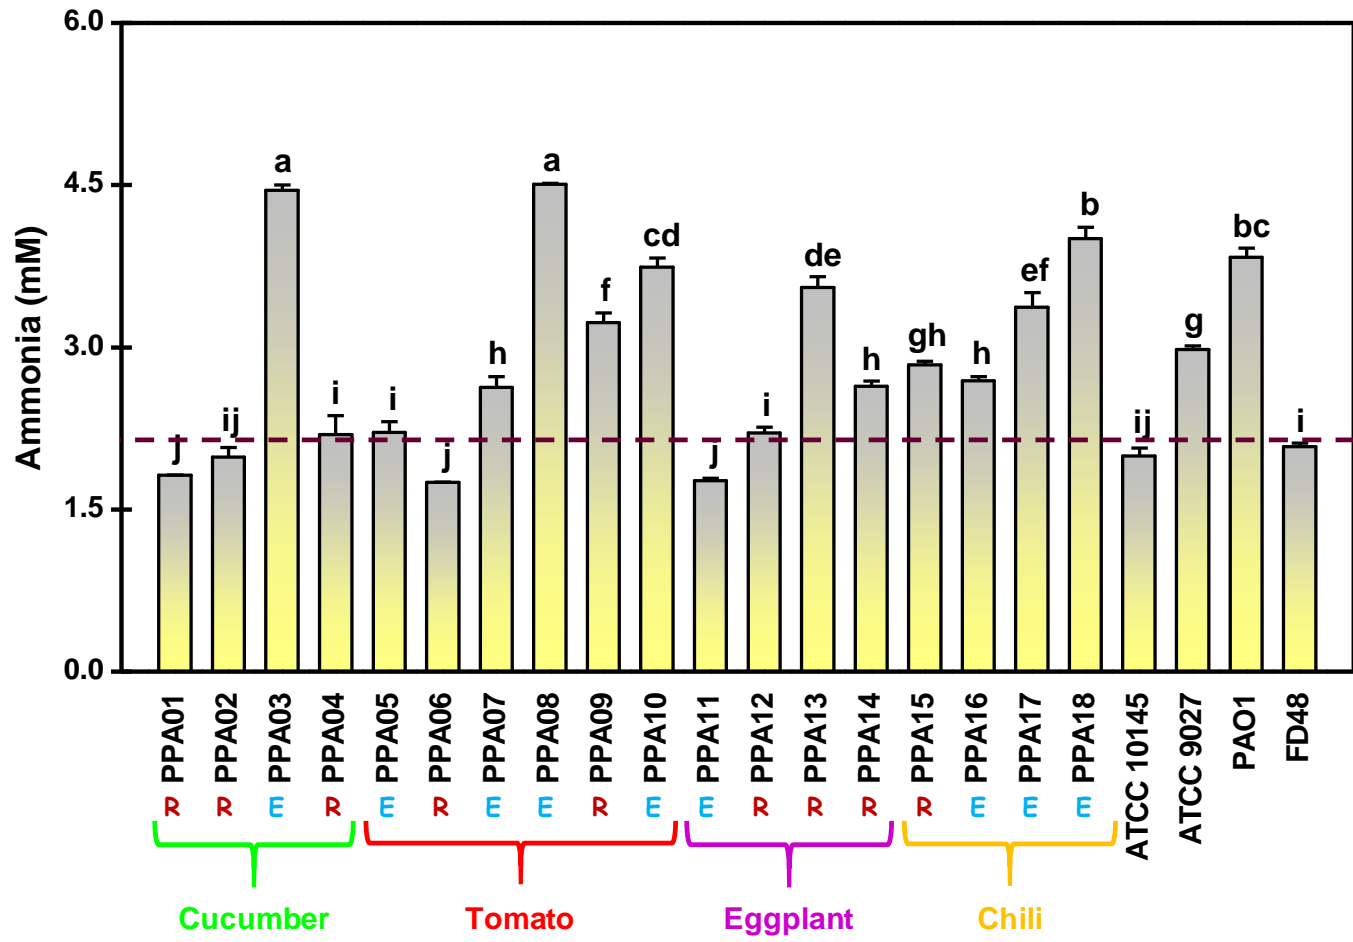

**Fig. 7**

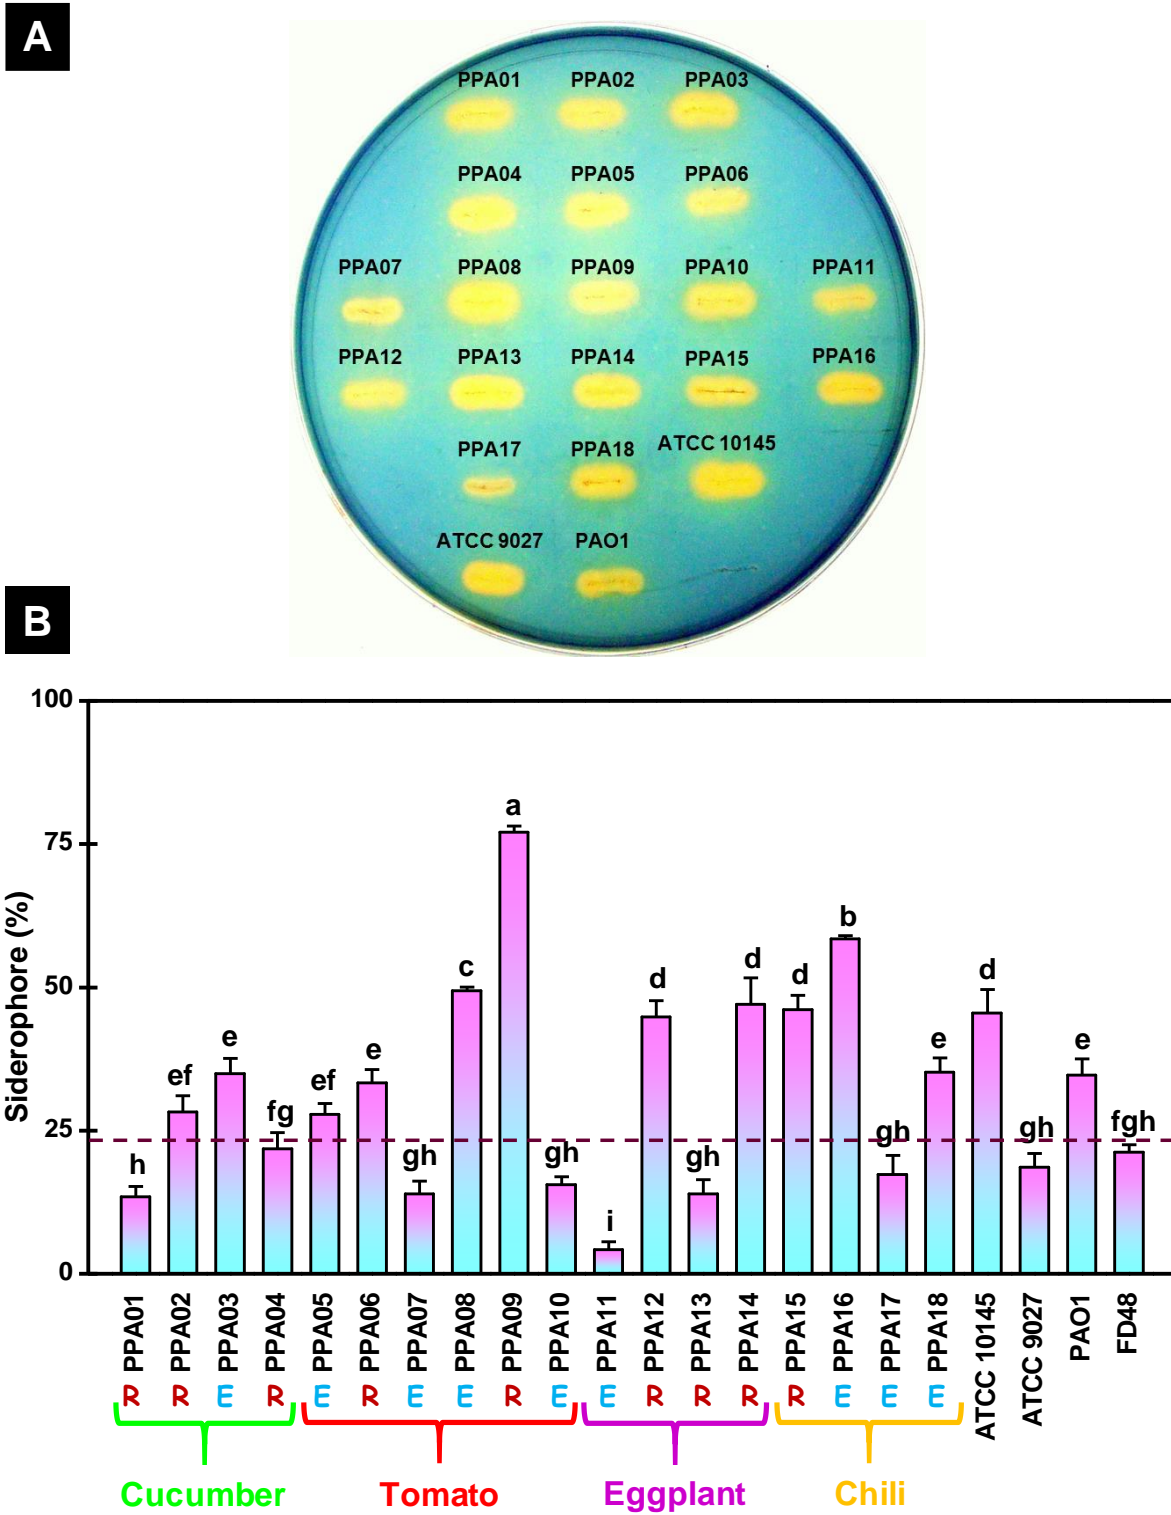

Fig. 8

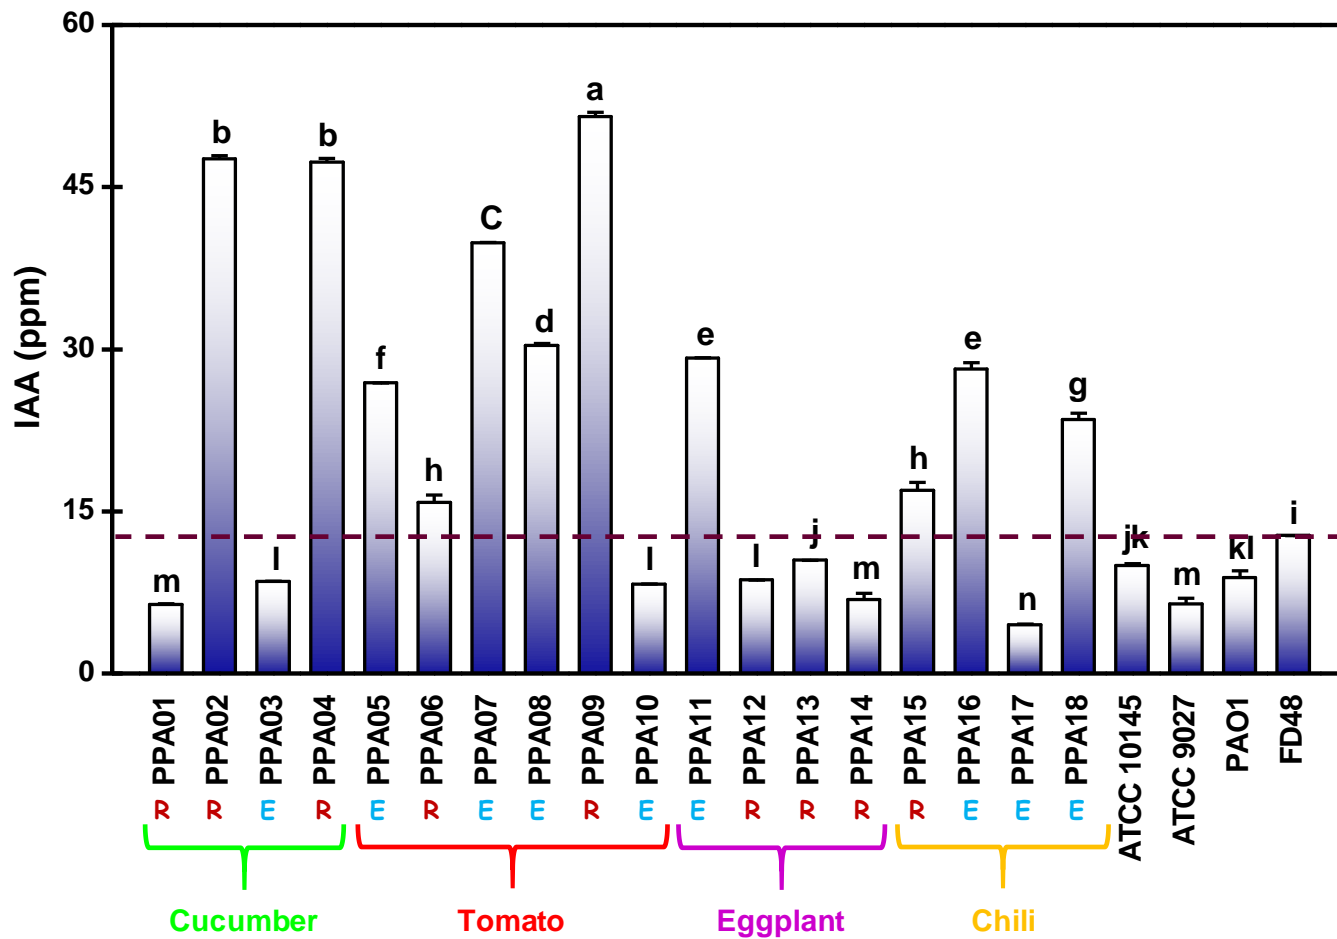

## Figure legends

**Fig. 1. Molecular confirmation of plant-associated *P. aeruginosa*.** (A) DNA amplification with *Pseudomonas* genus-specific primers PA-GS-F/R (amplicon size – 618 bp); Lane L, 100 bp marker. (B) PCR analysis with *P. aeruginosa* species-specific primers PA-SS-F/R (amplicon size – 956 bp); Lane L, 1 Kb marker; Lane 1 to 18, PPA01 to PPA18; Lane 19 to 21, ATCC10145, ATCC9027 and PAO1; Lane 22, *Enterobacter cloacae* (genera under gammaproteobacteria). Lane 23, negative control (no template). (C) PCR analysis with universal eubacterial primers (amplicon size – 1500 bp); Lane L, 1 Kb marker.

**Fig. 2. Pyocyanin production by *P. aeruginosa* strains.** (A) *P. aeruginosa* strains grown on pyocyanin-specific medium are exhibiting fluorescence under ultra-violet radiation, indicative of pyocyanin. (B) Quantitative pyocyanin levels released by *P. aeruginosa* strains. Values plotted are mean of three replicates with standard errors and the alphabets above the bars indicate the ranking of strains (significant differences ( $p < 0.05$ ) based on Duncan's multiple range test (DMRT)). The dashed line indicates the average levels of pyocyanin made by the clinical strains, ATCC10145, ATCC9027 and PAO1. R, rhizosphere strain; E, endophytic strain.

**Fig. 3. Phylogenetic and homology analyses of *P. aeruginosa* strains.** Phylogenetic tree based on Neighbor-Joining method constructed with 16S rDNA sequence of *P. aeruginosa* strains isolated in the current study (PPA01 to PPA18) from cucumber (green font), tomato (red font), eggplant (purple font), and chili (yellow plant); The clinical strains used are ATCC10145, ATCC9027, and PAO1 (blue font). Previously characterized agricultural *P. aeruginosa* strains (black font) are from various niches: *P. aeruginosa* AT5 (Accession No: MN636767) and *P. aeruginosa* PA4 (Accession No: MN636761), ginseng leaf, and rhizoplane, respectively. *P. aeruginosa* SEGB6 (Accession No: MN565979) is from guava leaf; and *P. aeruginosa* Ld-08 16S (Accession No: MT472133) is a lily endophyte. The following are rhizosphere isolates: *P. aeruginosa* KSG (Accession No: LN874213, grass); *P. aeruginosa* MML2212 (Accession No: EU344794, rice); *P. aeruginosa* KKRB-P1 (Accession No: MW149279, pine); *P. aeruginosa* MP1 (Accession No: MT937234, banana); *P. aeruginosa* VL4 (Accession No: MN611376, onion), and *P. aeruginosa*



choltrans (Accession No: MK782058, aloe vera). The 16S rDNA sequence of each strain was subjected to pairwise BLAST against PAO1.

**Fig. 4. DNA fingerprinting profile of *P. aeruginosa* strains.** Fingerprinting was done as described in materials and methods (A) ERIC fingerprint using ERIC2F and ERIC1R primers (Table 2). (B) BOX fingerprint using BOXA1 primer (Table 2). Lane 1 to 18, PPAO1 to PPA18; Lane 19 to 21, ATCC10145, ATCC9027 and PAO1; Lane 22, negative control (no template). (C) Bray-Curtis similarity-based non-metric multi-dimensional scaling (MDS) of the DNA fingerprinting pattern. The strains are color-coded based on their plant source, cucumber (green), tomato (red), eggplant (purple), and chili (yellow). R, rhizosphere strain; E, endophytic strain.

**Fig. 5. Mineral solubilization ability of *P. aeruginosa* strains.** The graphs represent the phosphorous (A), potassium (B), and zinc (C) solubilization index of *P. aeruginosa* strains. Values plotted are the mean of three replicates with standard errors. The alphabets above the bars indicate the ranking of strains (significant differences ( $p < 0.05$ ) based on Duncan's multiple range test (DMRT)). The dashed line indicates the level made by the control strains, *Bacillus subtilis* var. *phosphaticum* strain Pb1 (Phosphorous-solubilizing bacteria), *Paenibacillus mucilaginosus* strain KRB9 (Potassium-releasing bacteria), and *Pseudomonas chloraraphis* strains ZSB15 (Zinc-solubilizing bacteria). The strains are color-coded based on their plant source, cucumber (green), tomato (red), eggplant (purple), and chili (yellow). R, rhizosphere strains; E, endophytic strain. (D) Principal coordinate analysis (PCoA) based on Euclidean distance on mineral solubilization potential of *P. aeruginosa* strains. The percentage values in parentheses x- (PCoA1) and y-axis (PCoA2) depict the similarities and deviations among the strains based on their mineral solubilizing abilities.

**Fig. 6. Ammonia production by *P. aeruginosa* strains.** The graph represents the ammonia (mM) released by *P. aeruginosa*. Values plotted are the mean of three replicates with standard errors, and the alphabets above the bars indicate the ranking of strains (significant differences ( $p < 0.05$ ) based on Duncan's multiple range test (DMRT)). The dashed line indicates the level produced by the control, *Bacillus altitudinis*

strain FD48. The strains are color-coded based on their plant source, cucumber (green), tomato (red), eggplant (purple), and chili (yellow). R, rhizosphere strain; E, endophytic strain.

**Fig. 7. Siderophore production by *P. aeruginosa* strains.** (A) Qualitative detection of siderophores based on the presence of yellow zones around the *P. aeruginosa* strains on chrome azurol S (CAS) agar plate (blue). (B) Quantitative analysis of siderophores released by *P. aeruginosa*. Values plotted are the mean of three replicates with standard errors, and the alphabets above the bars indicate the ranking of strains (significant differences ( $p < 0.05$ ) based on Duncan's multiple range test (DMRT)). The dashed line indicates the level produced by the control, *Bacillus altitudinis* strain FD48. The strains are color-coded based on their plant source, cucumber (green), tomato (red), eggplant (purple), and chili (yellow). R, rhizosphere strain; E, endophytic strain.

**Fig. 8. Indole acetic acid (IAA) production by *P. aeruginosa* strains.** The graph represents IAA released by *P. aeruginosa* in parts per million (ppm). Values plotted are the mean of three replicates with standard errors, and the alphabets above the bars indicate the ranking of strains (significant differences ( $p < 0.05$ ) based on Duncan's multiple range test (DMRT)). The dashed line indicates the level produced by the control, *Bacillus altitudinis* strain FD48. The strains are color-coded based on their plant source, cucumber (green), tomato (red), eggplant (purple), and chili (yellow). R, rhizosphere strain; E, endophytic strain.
